# Supplementary material for: Y-box Protein-1 Regulates the Expression of Collagen I in Hepatic Progenitor Cells via PDGFR-β/ERK/p90RSK Signalling
Source: Stem Cells Int. 2017 Aug 27;2017:6193106. doi: 10.1155/2017/6193106 (PMC5591999; doi:10.1155/2017/6193106)
Supplement: Supplementary file 1 — Supplementary Table 1: The information of binding sites that YB-1 binds to in hepatic progenitor cells, including the detailed locations and names of the closest genes. Supplementary Table 2: RNA sequencing screened 691 differentially expressed genes between YB-1knockdown HPCs and the scramble control using the following criteria: log2-fold change>0.585 or log2-fold change<-0.585, and p value<0.05. [file 6193106.f1.xls]

## Sheet: Sheet1
Peak_ID	Chr	Peak_Start	Peak_End	Location	Closest_Gene
MACS_peak_1072	chr12	86056982	86057133	Promoter	Tgfb3
MACS_peak_1074	chr12	88269844	88269985	Promoter	Gm5662
MACS_peak_1095	chr12	103618233	103618376	Promoter	Serpina10
MACS_peak_1152	chr13	3150940	3151072	Promoter	Speer6-ps1
MACS_peak_1198	chr13	22773504	22773694	Promoter	Vmn1r208
MACS_peak_1255	chr13	47143456	47143605	Promoter	Rnf144b
MACS_peak_1292	chr13	58740370	58740510	Promoter	4930455J16Rik
MACS_peak_1344	chr13	66415952	66416287	Promoter	2410141K09Rik
MACS_peak_1347	chr13	66429430	66430114	Promoter	2410141K09Rik
MACS_peak_1426	chr13	91709778	91709918	Promoter	4833422C13Rik
MACS_peak_1427	chr13	92425066	92425198	Promoter	Ankrd34b
MACS_peak_1559	chr14	30884338	30884503	Promoter	Itih4
MACS_peak_1560	chr14	31140082	31140211	Promoter	Stab1
MACS_peak_1573	chr14	36875446	36875616	Promoter	Ccser2
MACS_peak_1609	chr14	55783017	55783170	Promoter	Adcy4
MACS_peak_1617	chr14	59378824	59378953	Promoter	Phf11c
MACS_peak_1617	chr14	59378824	59378953	Promoter	Setdb2-phf11c
MACS_peak_1855	chr15	34675410	34675531	Promoter	4930413F20Rik
MACS_peak_1855	chr15	34675410	34675531	Promoter	Nipal2
MACS_peak_190	chr1	87084800	87084900	Promoter	Alppl2
MACS_peak_192	chr1	87945694	87945850	Promoter	Usp40
MACS_peak_1945	chr15	65993718	65993849	Promoter	Kcnq3
MACS_peak_2015	chr15	82059115	82059272	Promoter	4930407I10Rik
MACS_peak_2016	chr15	82276835	82276986	Promoter	2016-09-03
MACS_peak_2017	chr15	82404354	82404540	Promoter	Cyp2d10
MACS_peak_2049	chr15	88600613	88600745	Promoter	Zdhhc25
MACS_peak_2082	chr15	96231011	96231257	Promoter	4833422M21Rik
MACS_peak_2083	chr15	96231333	96231557	Promoter	4833422M21Rik
MACS_peak_2101	chr15	101674604	101674758	Promoter	Krt6b
MACS_peak_2121	chr16	4219409	4219532	Promoter	4930455F16Rik
MACS_peak_2123	chr16	4546550	4546749	Promoter	Tfap4
MACS_peak_2147	chr16	13469761	13469921	Promoter	Mir6365
MACS_peak_2197	chr16	42727010	42727137	Promoter	4932412D23Rik
MACS_peak_2281	chr16	90720020	90720172	Promoter	Mis18a
MACS_peak_2332	chr17	8312259	8312464	Promoter	Sft2d1
MACS_peak_2358	chr17	15544342	15544481	Promoter	Prdm9
MACS_peak_2370	chr17	25059552	25059705	Promoter	Ift140
MACS_peak_2370	chr17	25059552	25059705	Promoter	Tmem204
MACS_peak_2408	chr17	36184296	36184408	Promoter	H2-T3
MACS_peak_242	chr1	118954690	118954843	Promoter	Gli2
MACS_peak_246	chr1	119546361	119546535	Promoter	Epb41l5
MACS_peak_2507	chr17	84656899	84657004	Promoter	Abcg5
MACS_peak_2508	chr17	84704308	84704508	Promoter	Lrpprc
MACS_peak_2563	chr18	10564997	10565119	Promoter	Esco1
MACS_peak_2620	chr18	34633370	34633544	Promoter	Cdc23
MACS_peak_2633	chr18	42180536	42180675	Promoter	Plac8l1
MACS_peak_2647	chr18	53647701	53647839	Promoter	Gm19466
MACS_peak_2662	chr18	61044456	61044670	Promoter	Pdgfrb
MACS_peak_2667	chr18	61689681	61689859	Promoter	Il17b
MACS_peak_2712	chr18	80228281	80228506	Promoter	Hsbp1l1
MACS_peak_2734	chr19	3259840	3260077	Promoter	Ighmbp2
MACS_peak_2755	chr19	13499553	13499784	Promoter	Olfr1477
MACS_peak_2842	chr19	41084576	41084710	Promoter	Tll2
MACS_peak_2848	chr19	42036762	42036945	Promoter	Ankrd2
MACS_peak_2951	chr1_GL456221_random	19275	19440	Promoter	LOC664787
MACS_peak_2956	chr1_GL456221_random	110125	110715	Promoter	Csprs
MACS_peak_2997	chr2	17996662	17996850	Promoter	H2afb1
MACS_peak_3028	chr2	32051954	32052093	Promoter	Nup214
MACS_peak_3029	chr2	32974713	32974836	Promoter	Slc2a8
MACS_peak_3043	chr2	38724913	38725062	Promoter	Nr6a1
MACS_peak_3124	chr2	84764435	84764660	Promoter	Serping1
MACS_peak_3128	chr2	87948255	87948409	Promoter	Olfr1156
MACS_peak_3160	chr2	106640971	106641131	Promoter	BB218582
MACS_peak_3191	chr2	127454983	127455193	Promoter	Kcnip3
MACS_peak_3219	chr2	144031912	144032053	Promoter	Banf2
MACS_peak_3231	chr2	151570597	151570829	Promoter	Sdcbp2
MACS_peak_3266	chr2	164891544	164891701	Promoter	Pcif1
MACS_peak_3285	chr2	170499696	170499848	Promoter	Gm16796
MACS_peak_3285	chr2	170499696	170499848	Promoter	Pfdn4
MACS_peak_3323	chr3	10205342	10205472	Promoter	Fabp4
MACS_peak_333	chr1	170308754	170308886	Promoter	1700015E13Rik
MACS_peak_336	chr1	171516547	171517075	Promoter	Itln1
MACS_peak_337	chr1	171518493	171518657	Promoter	Itln1
MACS_peak_345	chr1	171560629	171561302	Promoter	Cd244
MACS_peak_3554	chr3	142625406	142625601	Promoter	Gbp2
MACS_peak_3574	chr3	152822191	152822327	Promoter	St6galnac5
MACS_peak_357	chr1	173216323	173216465	Promoter	Olfr1404
MACS_peak_359	chr1	173591379	173591531	Promoter	Ifi213
MACS_peak_35	chr1	20801029	20801152	Promoter	Mcm3
MACS_peak_361	chr1	174331624	174331765	Promoter	Mptx1
MACS_peak_3626	chr4	15881500	15881614	Promoter	Calb1
MACS_peak_3646	chr4	26634893	26635011	Promoter	4930548K13Rik
MACS_peak_3678	chr4	42031794	42031923	Promoter	4933409K07Rik
MACS_peak_3678	chr4	42031794	42031923	Promoter	Gm3893
MACS_peak_3731	chr4	68762238	68762358	Promoter	Brinp1
MACS_peak_3853	chr4	130207601	130207738	Promoter	Gm853
MACS_peak_3865	chr4	131841947	131842093	Promoter	Mecr
MACS_peak_3876	chr4	135543018	135543160	Promoter	Grhl3
MACS_peak_3907	chr4	145789843	145790033	Promoter	Zfp991
MACS_peak_3907	chr4	145789843	145790033	Promoter	Znf41-ps
MACS_peak_3909	chr4	146158846	146159072	Promoter	Zfp600
MACS_peak_3911	chr4	146450137	146450430	Promoter	Zfp991
MACS_peak_3911	chr4	146450137	146450430	Promoter	Zfp992
MACS_peak_3954	chr4	156330992	156331125	Promoter	Vmn2r-ps159
MACS_peak_3988	chr5	14933806	14934194	Promoter	Speer4e
MACS_peak_3990	chr5	14972442	14972741	Promoter	Speer8-ps1
MACS_peak_4035	chr5	24530645	24530836	Promoter	Asb10
MACS_peak_4037	chr5	24645619	24645754	Promoter	1700022A21Rik
MACS_peak_4054	chr5	28200193	28200320	Promoter	Cnpy1
MACS_peak_4061	chr5	30465466	30465620	Promoter	1700001C02Rik
MACS_peak_4208	chr5	112212111	112212326	Promoter	Miat
MACS_peak_4216	chr5	115644606	115644758	Promoter	Rab35
MACS_peak_4250	chr5	130073782	130073949	Promoter	Tpst1
MACS_peak_4262	chr5	137641006	137641127	Promoter	Gm20605
MACS_peak_4262	chr5	137641006	137641127	Promoter	Lrch4
MACS_peak_4264	chr5	137981223	137981388	Promoter	Azgp1
MACS_peak_4268	chr5	139753164	139753380	Promoter	Ints1
MACS_peak_4273	chr5	141241209	141241340	Promoter	Sdk1
MACS_peak_4279	chr5	143299035	143299155	Promoter	E130309D02Rik
MACS_peak_4292	chr5	146503655	146503828	Promoter	4930449I24Rik
MACS_peak_4292	chr5	146503655	146503828	Promoter	Gm3415
MACS_peak_4293	chr5	146513836	146514017	Promoter	Gm3415
MACS_peak_4294	chr5	146525829	146525951	Promoter	Gm3404
MACS_peak_4295	chr5	146537613	146537750	Promoter	Gm3409
MACS_peak_4458	chr6	91977115	91977280	Promoter	Fgd5
MACS_peak_4460	chr6	92242471	92242582	Promoter	Trh
MACS_peak_4511	chr6	118064942	118065110	Promoter	Rasgef1a
MACS_peak_4519	chr6	122921353	122921490	Promoter	Clec4a1
MACS_peak_4522	chr6	125185881	125186023	Promoter	Ncapd2
MACS_peak_4533	chr6	128541278	128541426	Promoter	BC048546
MACS_peak_4550	chr6	132710504	132710727	Promoter	Tas2r122
MACS_peak_4563	chr6	136329081	136329278	Promoter	Gm8994
MACS_peak_4632	chr7	18554984	18555129	Promoter	Psg27
MACS_peak_4634	chr7	19725143	19725301	Promoter	Nectin2
MACS_peak_4642	chr7	21273638	21273806	Promoter	Vmn1r125
MACS_peak_4653	chr7	24778368	24778500	Promoter	Ceacam10
MACS_peak_4661	chr7	30290949	30291102	Promoter	Clip3
MACS_peak_4691	chr7	43951025	43951163	Promoter	Klk1b8
MACS_peak_4695	chr7	47186343	47186479	Promoter	Mrgpra6
MACS_peak_4717	chr7	59682572	59682809	Promoter	Snord116
MACS_peak_4717	chr7	59682572	59682809	Promoter	Snord116l1
MACS_peak_4717	chr7	59682572	59682809	Promoter	Snord116l2
MACS_peak_4718	chr7	59685044	59685262	Promoter	Snord116
MACS_peak_4718	chr7	59685044	59685262	Promoter	Snord116l1
MACS_peak_4718	chr7	59685044	59685262	Promoter	Snord116l2
MACS_peak_4719	chr7	59693641	59693804	Promoter	Snord116
MACS_peak_4719	chr7	59693641	59693804	Promoter	Snord116l1
MACS_peak_4719	chr7	59693641	59693804	Promoter	Snord116l2
MACS_peak_4720	chr7	59699802	59699964	Promoter	Snord116
MACS_peak_4720	chr7	59699802	59699964	Promoter	Snord116l1
MACS_peak_4720	chr7	59699802	59699964	Promoter	Snord116l2
MACS_peak_4734	chr7	63344819	63344953	Promoter	4930554H23Rik
MACS_peak_4762	chr7	73310635	73310776	Promoter	LOC100505025
MACS_peak_4772	chr7	79134216	79134371	Promoter	Mfge8
MACS_peak_4793	chr7	90424411	90424529	Promoter	Ccdc89
MACS_peak_4813	chr7	101882419	101882541	Promoter	Anapc15
MACS_peak_4815	chr7	102640746	102640902	Promoter	Olfr554
MACS_peak_4819	chr7	103416908	103417056	Promoter	Usp17lc
MACS_peak_4820	chr7	103732364	103732488	Promoter	Olfr628
MACS_peak_4824	chr7	104637574	104637713	Promoter	Olfr657
MACS_peak_4895	chr7	141880646	141880799	Promoter	Tollip
MACS_peak_4899	chr7	143949323	143949493	Promoter	Mir3470b
MACS_peak_4937	chr8	13568707	13568829	Promoter	Rasa3
MACS_peak_4950	chr8	18986933	18987075	Promoter	Defb37
MACS_peak_4955	chr8	19728179	19731349	Promoter	4930467E23Rik
MACS_peak_4955	chr8	19728179	19731349	Promoter	Gm21119
MACS_peak_4973	chr8	20267400	20268029	Promoter	6820431F20Rik
MACS_peak_4989	chr8	20613505	20614221	Promoter	Gm21119
MACS_peak_5019	chr8	25817661	25817821	Promoter	Ash2l
MACS_peak_5053	chr8	45395948	45396092	Promoter	Tlr3
MACS_peak_5101	chr8	61512018	61512200	Promoter	Palld
MACS_peak_5108	chr8	65028554	65028668	Promoter	Apela
MACS_peak_5117	chr8	66386123	66386275	Promoter	2016-03-01
MACS_peak_5203	chr8	105466993	105467182	Promoter	Tppp3
MACS_peak_5213	chr8	111068142	111068293	Promoter	Clec18a
MACS_peak_5291	chr9	27790036	27790185	Promoter	Opcml
MACS_peak_5312	chr9	38877796	38877961	Promoter	Olfr926
MACS_peak_5329	chr9	42965254	42965471	Promoter	Arhgef12
MACS_peak_5338	chr9	45078483	45078651	Promoter	Amica1
MACS_peak_540	chr10	58231159	58233247	Promoter	Dux
MACS_peak_5413	chr9	78290516	78290627	Promoter	Gm10639
MACS_peak_541	chr10	58233255	58234039	Promoter	Dux
MACS_peak_542	chr10	58234908	58235300	Promoter	Gm4981
MACS_peak_5468	chr9	106544446	106544579	Promoter	Iqcf3
MACS_peak_5475	chr9	109814669	109814823	Promoter	Spink8
MACS_peak_5482	chr9	110913723	110913879	Promoter	Gm590
MACS_peak_5490	chr9	115337345	115337487	Promoter	4930428G15Rik
MACS_peak_5568	chrX	33057969	33058111	Promoter	Gm2837
MACS_peak_5605	chrX	93305832	93305969	Promoter	Pola1
MACS_peak_577	chr10	76706762	76706922	Promoter	Col6a1
MACS_peak_584	chr10	79969019	79969161	Promoter	Bc1
MACS_peak_584	chr10	79969019	79969161	Promoter	Wdr18
MACS_peak_622	chr10	95338201	95338548	Promoter	2310039L15Rik
MACS_peak_673	chr10	122565362	122565513	Promoter	A130077B15Rik
MACS_peak_680	chr10	127349947	127350114	Promoter	Inhbe
MACS_peak_687	chr11	3129694	3130230	Promoter	Pisd-ps1
MACS_peak_787	chr11	58313894	58314043	Promoter	Zfp692
MACS_peak_788	chr11	59010028	59010199	Promoter	Obscn
MACS_peak_829	chr11	79727586	79727800	Promoter	Mir365-2
MACS_peak_855	chr11	96768040	96768197	Promoter	Snx11
MACS_peak_880	chr11	109354246	109354449	Promoter	Gm11696
MACS_peak_895	chr11	117486164	117486322	Promoter	Gm11733
MACS_peak_1001	chr12	41091931	41092120	Intron	Immp2l
MACS_peak_1002	chr12	41131040	41131179	Intron	Immp2l
MACS_peak_1003	chr12	41222195	41222309	Intron	Immp2l
MACS_peak_1004	chr12	41680176	41680302	Intron	Immp2l
MACS_peak_1005	chr12	41773781	41773932	Intron	Immp2l
MACS_peak_1014	chr12	44878411	44878523	Intron	Stxbp6
MACS_peak_1015	chr12	44969141	44969327	Intron	Stxbp6
MACS_peak_101	chr1	55457998	55458133	Intron	Plcl1
MACS_peak_1024	chr12	51012502	51012672	Intron	1700008C04Rik
MACS_peak_1025	chr12	51897092	51897253	Intron	Heatr5a
MACS_peak_1026	chr12	52123016	52123215	Intron	Nubpl
MACS_peak_1027	chr12	52307418	52307580	Intron	Nubpl
MACS_peak_1028	chr12	52907126	52907432	Intron	Akap6
MACS_peak_1029	chr12	53412317	53412427	Intron	Npas3
MACS_peak_1031	chr12	54920720	54920886	Intron	Baz1a
MACS_peak_1032	chr12	55867289	55867419	Intron	Brms1l
MACS_peak_1033	chr12	56754738	56754887	Intron	Slc25a21
MACS_peak_1034	chr12	56917247	56917418	Intron	Slc25a21
MACS_peak_1035	chr12	57025146	57025271	Intron	Slc25a21
MACS_peak_1048	chr12	70858862	70859057	Intron	Frmd6
MACS_peak_1049	chr12	71214893	71215035	Intron	2700049A03Rik
MACS_peak_1050	chr12	72262867	72263047	Intron	Rtn1
MACS_peak_1052	chr12	73743537	73743649	Intron	Prkch
MACS_peak_1056	chr12	75936345	75936472	Intron	Syne2
MACS_peak_1057	chr12	75984891	75985022	Intron	Syne2
MACS_peak_1058	chr12	76268662	76268834	Intron	Mthfd1
MACS_peak_1059	chr12	76312691	76312871	Intron	Mthfd1
MACS_peak_1060	chr12	77397446	77397599	Intron	Fut8
MACS_peak_1062	chr12	78538460	78538609	Intron	Gphn
MACS_peak_1063	chr12	79248404	79248533	Intron	Zfyve26
MACS_peak_1064	chr12	79594879	79595125	Intron	Rad51b
MACS_peak_1066	chr12	81243453	81243578	Intron	Slc8a3
MACS_peak_1067	chr12	81642791	81642952	Intron	Ttc9
MACS_peak_1069	chr12	83538089	83538222	Intron	Dcaf4
MACS_peak_106	chr1	57892468	57892648	Intron	Spats2l
MACS_peak_1081	chr12	99770251	99770343	Intron	Efcab11
MACS_peak_1082	chr12	99843992	99844112	Intron	Efcab11
MACS_peak_1083	chr12	99857377	99857516	Intron	Efcab11
MACS_peak_1086	chr12	100818749	100818989	Intron	9030617O03Rik
MACS_peak_1087	chr12	100819052	100819236	Intron	9030617O03Rik
MACS_peak_1088	chr12	100863806	100864002	Intron	9030617O03Rik
MACS_peak_108	chr1	58123029	58123158	Intron	Aox3
MACS_peak_1091	chr12	102406432	102406643	Intron	Lgmn
MACS_peak_1092	chr12	102493905	102494079	Intron	Golga5
MACS_peak_1093	chr12	103211301	103211443	Intron	Prima1
MACS_peak_1097	chr12	105636763	105636947	Intron	Atg2b
MACS_peak_10	chr1	9058276	9058410	Intron	Sntg1
MACS_peak_1101	chr12	108485781	108485932	Intron	Eml1
MACS_peak_1107	chr12	111064625	111064914	Intron	Rcor1
MACS_peak_1108	chr12	111237170	111237305	Intron	Traf3
MACS_peak_1147	chr12	116248304	116248458	Intron	Wdr60
MACS_peak_1148	chr12	116411938	116412090	Intron	Ncapg2
MACS_peak_1149	chr12	116678188	116678460	Intron	Ptprn2
MACS_peak_114	chr1	61974029	61974171	Intron	Pard3b
MACS_peak_1158	chr13	4606450	4606896	Intron	Akr1e1
MACS_peak_115	chr1	61986337	61986547	Intron	Pard3b
MACS_peak_1164	chr13	6593926	6594045	Intron	Pfkp
MACS_peak_116	chr1	62528231	62528358	Intron	Pard3b
MACS_peak_1174	chr13	10276083	10276224	Intron	Chrm3
MACS_peak_1177	chr13	13484144	13484296	Intron	Nid1
MACS_peak_117	chr1	62715083	62715248	Intron	Nrp2
MACS_peak_1186	chr13	18287049	18287220	Intron	Pou6f2
MACS_peak_1191	chr13	20188171	20188307	Intron	Elmo1
MACS_peak_1192	chr13	20195048	20195187	Intron	Elmo1
MACS_peak_1193	chr13	20497280	20497431	Intron	Elmo1
MACS_peak_1194	chr13	20853542	20853656	Intron	Aoah
MACS_peak_11	chr1	9241192	9241315	Intron	Sntg1
MACS_peak_1204	chr13	24068025	24068129	Intron	Carmil1
MACS_peak_1205	chr13	24170882	24171061	Intron	Carmil1
MACS_peak_1206	chr13	25259123	25259303	Intron	Nrsn1
MACS_peak_1211	chr13	29200699	29200819	Intron	Cdkal1
MACS_peak_1212	chr13	29235038	29235172	Intron	Cdkal1
MACS_peak_1214	chr13	30374891	30375233	Intron	Agtr1a
MACS_peak_1218	chr13	31987414	31987570	Intron	Gmds
MACS_peak_1222	chr13	33841650	33841786	Intron	Serpinb6e
MACS_peak_1225	chr13	34224735	34225006	Intron	Slc22a23
MACS_peak_122	chr1	66553811	66553974	Intron	Unc80
MACS_peak_1245	chr13	43245149	43245342	Intron	Gfod1
MACS_peak_1252	chr13	45526563	45526673	Intron	Gmpr
MACS_peak_1253	chr13	46857857	46857972	Intron	Kif13a
MACS_peak_1254	chr13	46909380	46909553	Intron	Kif13a
MACS_peak_1256	chr13	47213436	47213571	Intron	Rnf144b
MACS_peak_1258	chr13	48252786	48252917	Intron	A330033J07Rik
MACS_peak_1260	chr13	48821243	48821356	Intron	Phf2
MACS_peak_1262	chr13	49194447	49194686	Intron	Ninj1
MACS_peak_126	chr1	68792296	68792429	Intron	Erbb4
MACS_peak_1272	chr13	52609256	52609411	Intron	Syk
MACS_peak_1274	chr13	52754750	52754922	Intron	BB123696
MACS_peak_1277	chr13	53442383	53442560	Intron	Gm2762
MACS_peak_127	chr1	69559819	69560129	Intron	Ikzf2
MACS_peak_1285	chr13	55016965	55017103	Intron	Hk3
MACS_peak_1287	chr13	56827770	56827908	Intron	Trpc7
MACS_peak_1289	chr13	58256207	58256341	Intron	Gkap1
MACS_peak_128	chr1	70105533	70105671	Intron	Spag16
MACS_peak_1290	chr13	58267240	58267379	Intron	Gkap1
MACS_peak_1296	chr13	59788252	59788412	Intron	Zcchc6
MACS_peak_1298	chr13	60059845	60059996	Intron	A530065N20Rik
MACS_peak_129	chr1	70483117	70483232	Intron	Spag16
MACS_peak_1309	chr13	64213042	64213201	Intron	Cdc14b
MACS_peak_131	chr1	71332265	71332388	Intron	Abca12
MACS_peak_1345	chr13	66422299	66422414	Intron	2410141K09Rik
MACS_peak_1346	chr13	66426896	66427206	Intron	2410141K09Rik
MACS_peak_1348	chr13	66436011	66436346	Intron	2410141K09Rik
MACS_peak_134	chr1	72338618	72338834	Intron	Xrcc5
MACS_peak_135	chr1	73791192	73791328	Intron	6030407O03Rik
MACS_peak_136	chr1	73832397	73832575	Intron	6030407O03Rik
MACS_peak_1369	chr13	67179963	67180103	Intron	Rsl1
MACS_peak_137	chr1	73832635	73832894	Intron	6030407O03Rik
MACS_peak_1379	chr13	68648199	68648339	Intron	Adcy2
MACS_peak_1380	chr13	68947118	68947241	Intron	Adcy2
MACS_peak_1381	chr13	68964048	68964203	Intron	Adcy2
MACS_peak_138	chr1	73832965	73833391	Intron	6030407O03Rik
MACS_peak_1395	chr13	73829981	73830201	Intron	Nkd2
MACS_peak_1397	chr13	74244019	74244167	Intron	Ahrr
MACS_peak_13	chr1	11431919	11432075	Intron	A830018L16Rik
MACS_peak_1405	chr13	76614719	76614855	Intron	Mctp1
MACS_peak_1406	chr13	76866483	76866573	Intron	Mctp1
MACS_peak_1407	chr13	77372453	77372588	Intron	2210408I21Rik
MACS_peak_1408	chr13	77788700	77788823	Intron	Fam172a
MACS_peak_1414	chr13	81586433	81586551	Intron	Adgrv1
MACS_peak_1424	chr13	91106493	91106655	Intron	Atg10
MACS_peak_1428	chr13	92617562	92617744	Intron	Serinc5
MACS_peak_1433	chr13	95245774	95245924	Intron	Pde8b
MACS_peak_1435	chr13	96933529	96933691	Intron	Gcnt4
MACS_peak_1436	chr13	97478447	97478599	Intron	Lncenc1
MACS_peak_1444	chr13	100819025	100819185	Intron	Slc30a5
MACS_peak_1450	chr13	103617169	103617326	Intron	Gm30551
MACS_peak_1454	chr13	106809712	106809865	Intron	Ipo11
MACS_peak_1455	chr13	106870150	106870304	Intron	Ipo11
MACS_peak_1456	chr13	106907030	106907161	Intron	Ipo11
MACS_peak_1461	chr13	109462779	109462969	Intron	Pde4d
MACS_peak_1469	chr13	112343325	112343471	Intron	Ankrd55
MACS_peak_146	chr1	78159457	78159603	Intron	Pax3
MACS_peak_1473	chr13	113841711	113841822	Intron	Arl15
MACS_peak_1474	chr13	113908924	113909017	Intron	Arl15
MACS_peak_1475	chr13	114014837	114014955	Intron	Arl15
MACS_peak_1476	chr13	114082659	114082805	Intron	Arl15
MACS_peak_1477	chr13	114150671	114150813	Intron	A430090L17Rik
MACS_peak_1477	chr13	114150671	114150813	Intron	Arl15
MACS_peak_1484	chr13	117643692	117643869	Intron	Hcn1
MACS_peak_1485	chr13	119491717	119492009	Intron	Tmem267
MACS_peak_1486	chr13	119492014	119492427	Intron	Tmem267
MACS_peak_1487	chr13	119598133	119603166	Intron	Tmem267
MACS_peak_1489	chr14	3545447	3546236	Intron	Gm5795
MACS_peak_1492	chr14	4338769	4338958	Intron	2610042L04Rik
MACS_peak_149	chr1	79812293	79812441	Intron	Serpine2
MACS_peak_14	chr1	11720185	11720365	Intron	A830018L16Rik
MACS_peak_1511	chr14	10262653	10262788	Intron	Fhit
MACS_peak_1512	chr14	10535828	10535991	Intron	Fhit
MACS_peak_1513	chr14	11034828	11034966	Intron	Fhit
MACS_peak_1514	chr14	11888077	11888214	Intron	Ptprg
MACS_peak_1515	chr14	12227503	12227687	Intron	Ptprg
MACS_peak_1521	chr14	17710695	17710853	Intron	Thrb
MACS_peak_1522	chr14	18602771	18602921	Intron	Ube2e2
MACS_peak_1523	chr14	18818444	18818641	Intron	Ube2e2
MACS_peak_1524	chr14	18823345	18823500	Intron	Ube2e2
MACS_peak_1532	chr14	21615416	21615591	Intron	Kat6b
MACS_peak_1534	chr14	22398102	22398243	Intron	1700112E06Rik
MACS_peak_1535	chr14	22529405	22529566	Intron	1700112E06Rik
MACS_peak_1535	chr14	22529405	22529566	Intron	4930405A10Rik
MACS_peak_1536	chr14	22642110	22642232	Intron	1700112E06Rik
MACS_peak_1537	chr14	22793973	22794122	Intron	1700112E06Rik
MACS_peak_1539	chr14	23722524	23722651	Intron	Kcnma1
MACS_peak_153	chr1	82406978	82407176	Intron	Rhbdd1
MACS_peak_1540	chr14	23820656	23820786	Intron	Kcnma1
MACS_peak_1541	chr14	23867998	23868157	Intron	Kcnma1
MACS_peak_1542	chr14	23975025	23975166	Intron	Kcnma1
MACS_peak_1544	chr14	24151433	24151595	Intron	Dlg5
MACS_peak_154	chr1	82712848	82713000	Intron	Col4a3
MACS_peak_1553	chr14	27635976	27636118	Intron	Erc2
MACS_peak_1554	chr14	27703445	27703606	Intron	Erc2
MACS_peak_1555	chr14	28126188	28126320	Intron	Erc2
MACS_peak_1556	chr14	29045879	29046042	Intron	Cacna2d3
MACS_peak_1557	chr14	29596137	29596278	Intron	Cacna2d3
MACS_peak_1558	chr14	30666291	30666405	Intron	Rft1
MACS_peak_1562	chr14	31299580	31299743	Intron	Dnah1
MACS_peak_1564	chr14	32428085	32428202	Intron	Chat
MACS_peak_1565	chr14	33082764	33082899	Intron	Wdfy4
MACS_peak_1566	chr14	33150549	33150708	Intron	Wdfy4
MACS_peak_1568	chr14	33633897	33634096	Intron	Ptpn20
MACS_peak_1570	chr14	35093191	35093334	Intron	Grid1
MACS_peak_1571	chr14	35460451	35460574	Intron	Grid1
MACS_peak_1574	chr14	37094436	37094570	Intron	Cdhr1
MACS_peak_1579	chr14	40846816	40846951	Intron	Sh2d4b
MACS_peak_158	chr1	84199478	84199639	Intron	Pid1
MACS_peak_1594	chr14	45365343	45365518	Intron	Styx
MACS_peak_1596	chr14	47561101	47561233	Intron	Atg14
MACS_peak_1599	chr14	49368821	49368953	Intron	Slc35f4
MACS_peak_1602	chr14	51595954	51596237	Intron	Gm5622
MACS_peak_1603	chr14	51598989	51599189	Intron	Gm5622
MACS_peak_1608	chr14	54924651	54924790	Intron	Efs
MACS_peak_160	chr1	84621850	84622011	Intron	Dner
MACS_peak_1612	chr14	57514344	57514486	Intron	Ift88
MACS_peak_1613	chr14	57600017	57600191	Intron	Xpo4
MACS_peak_1614	chr14	57991364	57991490	Intron	Micu2
MACS_peak_1618	chr14	59674908	59675123	Intron	Atp8a2
MACS_peak_1619	chr14	60050228	60050370	Intron	Atp8a2
MACS_peak_161	chr1	84653092	84653255	Intron	Dner
MACS_peak_1624	chr14	61199081	61199230	Intron	Sacs
MACS_peak_1629	chr14	62804510	62804677	Intron	4931440J10Rik
MACS_peak_1632	chr14	63656881	63657047	Intron	Xkr6
MACS_peak_1633	chr14	63698556	63698699	Intron	Xkr6
MACS_peak_1634	chr14	64194843	64195012	Intron	Msra
MACS_peak_1637	chr14	65029867	65030028	Intron	Ints9
MACS_peak_1638	chr14	65734007	65734149	Intron	Scara5
MACS_peak_1641	chr14	67255398	67255563	Intron	Ebf2
MACS_peak_1648	chr14	70047359	70047493	Intron	Pebp4
MACS_peak_164	chr1	85100187	85100522	Intron	A530032D15Rik
MACS_peak_1658	chr14	75509799	75509928	Intron	Siah3
MACS_peak_1659	chr14	77052982	77053132	Intron	Ccdc122
MACS_peak_165	chr1	85105478	85105705	Intron	A530032D15Rik
MACS_peak_1660	chr14	77232105	77232225	Intron	Enox1
MACS_peak_1661	chr14	77509051	77509174	Intron	Enox1
MACS_peak_1662	chr14	77990199	77990338	Intron	Epsti1
MACS_peak_1664	chr14	78615982	78616114	Intron	Dgkh
MACS_peak_1680	chr14	86987191	86987337	Intron	Diaph3
MACS_peak_1681	chr14	87538495	87538631	Intron	Tdrd3
MACS_peak_1690	chr14	96485952	96486093	Intron	Klhl1
MACS_peak_1693	chr14	97824844	97824966	Intron	Dach1
MACS_peak_1694	chr14	98011886	98012078	Intron	Dach1
MACS_peak_1697	chr14	99209193	99209347	Intron	Pibf1
MACS_peak_1698	chr14	99225006	99225162	Intron	Pibf1
MACS_peak_16	chr1	12711817	12712010	Intron	Sulf1
MACS_peak_1701	chr14	101464134	101464291	Intron	Tbc1d4
MACS_peak_1703	chr14	103652267	103652442	Intron	Slain1
MACS_peak_170	chr1	85249368	85249751	Intron	C130026I21Rik
MACS_peak_1720	chr14	115802981	115803157	Intron	Gpc5
MACS_peak_1721	chr14	115835686	115835801	Intron	Gpc5
MACS_peak_1722	chr14	115930825	115930967	Intron	Gpc5
MACS_peak_1723	chr14	116508451	116508582	Intron	Gpc5
MACS_peak_1724	chr14	117836050	117836221	Intron	Gpc6
MACS_peak_1726	chr14	120032271	120032748	Intron	Oxgr1
MACS_peak_1728	chr14	120502140	120502298	Intron	Rap2a
MACS_peak_1734	chr14	122243958	122244115	Intron	Clybl
MACS_peak_1735	chr14	122247889	122248013	Intron	Clybl
MACS_peak_1736	chr14	122570294	122570436	Intron	Pcca
MACS_peak_1737	chr14	122660348	122660466	Intron	Pcca
MACS_peak_1738	chr14	122715661	122715785	Intron	Pcca
MACS_peak_1740	chr14	123724537	123724670	Intron	Itgbl1
MACS_peak_1744	chr15	4434542	4434741	Intron	Plcxd3
MACS_peak_1747	chr15	5043700	5043889	Intron	C7
MACS_peak_1749	chr15	7283151	7283254	Intron	Egflam
MACS_peak_1755	chr15	9006086	9006289	Intron	Ranbp3l
MACS_peak_1756	chr15	9006334	9006502	Intron	Ranbp3l
MACS_peak_1757	chr15	9152775	9152914	Intron	Lmbrd2
MACS_peak_1757	chr15	9152775	9152914	Intron	Skp2
MACS_peak_1760	chr15	9618578	9618722	Intron	Spef2
MACS_peak_1761	chr15	9679471	9679610	Intron	Spef2
MACS_peak_1764	chr15	11166019	11166172	Intron	Adamts12
MACS_peak_1768	chr15	12479459	12479611	Intron	Pdzd2
MACS_peak_1769	chr15	12515189	12515325	Intron	Pdzd2
MACS_peak_1773	chr15	12872912	12873462	Intron	Drosha
MACS_peak_1789	chr15	16838232	16838366	Intron	Cdh9
MACS_peak_1796	chr15	18246485	18246640	Intron	4921515E04Rik
MACS_peak_1808	chr15	21311069	21311216	Intron	Cdh12
MACS_peak_1817	chr15	23093124	23093249	Intron	Cdh18
MACS_peak_1818	chr15	23297130	23297252	Intron	Cdh18
MACS_peak_1825	chr15	26324650	26324819	Intron	2016-03-11
MACS_peak_1827	chr15	26573188	26573323	Intron	Fbxl7
MACS_peak_1828	chr15	26823064	26823202	Intron	Fbxl7
MACS_peak_1829	chr15	26826747	26826916	Intron	Fbxl7
MACS_peak_182	chr1	85591934	85592150	Intron	Sp110
MACS_peak_1834	chr15	28297999	28298142	Intron	Dnah5
MACS_peak_1843	chr15	30341986	30342159	Intron	Ctnnd2
MACS_peak_1844	chr15	30638004	30638142	Intron	Ctnnd2
MACS_peak_1845	chr15	30767968	30768088	Intron	Ctnnd2
MACS_peak_1848	chr15	33160035	33160147	Intron	Cpq
MACS_peak_1849	chr15	33238861	33238962	Intron	Cpq
MACS_peak_1850	chr15	33447596	33447723	Intron	Cpq
MACS_peak_1851	chr15	33557859	33558014	Intron	Cpq
MACS_peak_1853	chr15	34643796	34643912	Intron	Nipal2
MACS_peak_1854	chr15	34650523	34650633	Intron	Nipal2
MACS_peak_1859	chr15	34922712	34922857	Intron	Stk3
MACS_peak_185	chr1	85652875	85653035	Intron	Sp100
MACS_peak_1861	chr15	36487703	36487890	Intron	Ankrd46
MACS_peak_1867	chr15	39477316	39477502	Intron	Rims2
MACS_peak_1870	chr15	40691530	40691725	Intron	Zfpm2
MACS_peak_1873	chr15	41451797	41452204	Intron	Oxr1
MACS_peak_1874	chr15	41578711	41578914	Intron	Oxr1
MACS_peak_1879	chr15	43466173	43466327	Intron	Gm10373
MACS_peak_1885	chr15	44757486	44757584	Intron	Sybu
MACS_peak_1889	chr15	46361215	46361337	Intron	1700022A22Rik
MACS_peak_1891	chr15	46626275	46626423	Intron	4930548G14Rik
MACS_peak_1895	chr15	47594990	47595212	Intron	Csmd3
MACS_peak_1896	chr15	47623224	47623458	Intron	Csmd3
MACS_peak_1897	chr15	47627480	47627658	Intron	Csmd3
MACS_peak_1898	chr15	47652664	47652849	Intron	Csmd3
MACS_peak_1899	chr15	48367930	48368080	Intron	Csmd3
MACS_peak_189	chr1	86366113	86366275	Intron	C130036L24Rik
MACS_peak_1917	chr15	55419721	55419926	Intron	Col14a1
MACS_peak_191	chr1	87819618	87819813	Intron	Sag
MACS_peak_1920	chr15	57274677	57274850	Intron	Slc22a22
MACS_peak_1936	chr15	64707792	64707944	Intron	Adcy8
MACS_peak_1937	chr15	64826176	64826316	Intron	Adcy8
MACS_peak_1946	chr15	66141458	66141607	Intron	Kcnq3
MACS_peak_1949	chr15	66415038	66415186	Intron	Lrrc6
MACS_peak_194	chr1	88229241	88230164	Intron	Mroh2a
MACS_peak_1950	chr15	66420007	66420139	Intron	Lrrc6
MACS_peak_1951	chr15	66455282	66455457	Intron	Lrrc6
MACS_peak_1952	chr15	67168359	67168518	Intron	St3gal1
MACS_peak_195	chr1	88231512	88232113	Intron	Mroh2a
MACS_peak_1962	chr15	69988095	69988232	Intron	Gm19782
MACS_peak_1967	chr15	71856408	71856566	Intron	Col22a1
MACS_peak_1968	chr15	71900337	71900496	Intron	Col22a1
MACS_peak_1969	chr15	71946124	71946249	Intron	Col22a1
MACS_peak_1970	chr15	71955463	71955594	Intron	Col22a1
MACS_peak_1973	chr15	72516483	72516687	Intron	Kcnk9
MACS_peak_1975	chr15	72636478	72636648	Intron	Trappc9
MACS_peak_1976	chr15	72919760	72920094	Intron	Trappc9
MACS_peak_1977	chr15	72998020	72998179	Intron	Trappc9
MACS_peak_1978	chr15	73324878	73325123	Intron	Ptk2
MACS_peak_1985	chr15	74450326	74450492	Intron	Gm32168
MACS_peak_1988	chr15	74776029	74776197	Intron	D730001G18Rik
MACS_peak_1995	chr15	76125638	76125782	Intron	BC024139
MACS_peak_1996	chr15	77440895	77441098	Intron	Apol7b
MACS_peak_1997	chr15	77443528	77443806	Intron	Apol7b
MACS_peak_2006	chr15	78708405	78708576	Intron	Elfn2
MACS_peak_2009	chr15	80361318	80361445	Intron	Cacna1i
MACS_peak_2013	chr15	80526523	80526691	Intron	Enthd1
MACS_peak_201	chr1	88365508	88365642	Intron	Trpm8
MACS_peak_2020	chr15	83847688	83847830	Intron	Mpped1
MACS_peak_2021	chr15	83920509	83920628	Intron	Efcab6
MACS_peak_2022	chr15	83981283	83981416	Intron	Efcab6
MACS_peak_2023	chr15	84080992	84081152	Intron	Sult4a1
MACS_peak_2024	chr15	84426940	84427089	Intron	1810041L15Rik
MACS_peak_2027	chr15	84954244	84954498	Intron	5031439G07Rik
MACS_peak_2028	chr15	85137108	85137234	Intron	Ribc2
MACS_peak_2030	chr15	85372166	85372330	Intron	Atxn10
MACS_peak_2031	chr15	85862983	85863275	Intron	Gtse1
MACS_peak_2039	chr15	87557406	87557636	Intron	Fam19a5
MACS_peak_2040	chr15	87709528	87709731	Intron	Fam19a5
MACS_peak_2046	chr15	88369498	88369663	Intron	B230214G05Rik
MACS_peak_204	chr1	89761267	89761401	Intron	Agap1
MACS_peak_2058	chr15	91463077	91463223	Intron	Slc2a13
MACS_peak_205	chr1	89763253	89763405	Intron	Agap1
MACS_peak_2060	chr15	91724833	91724966	Intron	Lrrk2
MACS_peak_2061	chr15	91741227	91741374	Intron	Lrrk2
MACS_peak_2066	chr15	92057996	92058130	Intron	Cntn1
MACS_peak_2067	chr15	92214115	92214284	Intron	Cntn1
MACS_peak_2068	chr15	92297389	92297537	Intron	Cntn1
MACS_peak_2069	chr15	92470135	92470282	Intron	Pdzrn4
MACS_peak_2070	chr15	92728250	92728492	Intron	Pdzrn4
MACS_peak_2076	chr15	94869715	94869911	Intron	Tmem117
MACS_peak_2077	chr15	95464290	95464395	Intron	Nell2
MACS_peak_207	chr1	91838605	91838775	Intron	Twist2
MACS_peak_2080	chr15	95922187	95922502	Intron	Ano6
MACS_peak_2081	chr15	96187125	96187337	Intron	Gm4371
MACS_peak_2092	chr15	97990157	97990346	Intron	Col2a1
MACS_peak_2095	chr15	99201005	99201131	Intron	Spats2
MACS_peak_2096	chr15	99283098	99283314	Intron	Fam186b
MACS_peak_2098	chr15	100704923	100705058	Intron	Galnt6
MACS_peak_2099	chr15	100709549	100709673	Intron	Galnt6
MACS_peak_209	chr1	92882087	92882241	Intron	Ankmy1
MACS_peak_2100	chr15	100786712	100786844	Intron	Slc4a8
MACS_peak_2104	chr15	101816672	101816774	Intron	Krt2
MACS_peak_211	chr1	93577054	93577198	Intron	Farp2
MACS_peak_2122	chr16	4501705	4501869	Intron	Srl
MACS_peak_2124	chr16	5246434	5246543	Intron	Eef2kmt
MACS_peak_2127	chr16	6194234	6194367	Intron	Rbfox1
MACS_peak_2128	chr16	6606956	6607098	Intron	Rbfox1
MACS_peak_2129	chr16	7107048	7107186	Intron	Rbfox1
MACS_peak_2130	chr16	7117803	7117985	Intron	Rbfox1
MACS_peak_2132	chr16	8415298	8415417	Intron	Tmem114
MACS_peak_2140	chr16	10199852	10199987	Intron	Atf7ip2
MACS_peak_2141	chr16	10391358	10391497	Intron	Tekt5
MACS_peak_2143	chr16	11684384	11684515	Intron	Snx29
MACS_peak_2145	chr16	12829719	12829873	Intron	1700003L19Rik
MACS_peak_2146	chr16	12836905	12837064	Intron	1700003L19Rik
MACS_peak_2148	chr16	14196906	14197074	Intron	Myh11
MACS_peak_2155	chr16	16757643	16757775	Intron	Spag6l
MACS_peak_2163	chr16	20521395	20521536	Intron	Dvl3
MACS_peak_2165	chr16	20740978	20741119	Intron	Chrd
MACS_peak_2167	chr16	22390188	22390338	Intron	Etv5
MACS_peak_2173	chr16	27415876	27416001	Intron	Ccdc50
MACS_peak_2174	chr16	27433109	27433281	Intron	Ccdc50
MACS_peak_2175	chr16	28195727	28195890	Intron	Fgf12
MACS_peak_2177	chr16	30980856	30981022	Intron	Mir1195
MACS_peak_2177	chr16	30980856	30981022	Intron	Xxylt1
MACS_peak_2178	chr16	31826470	31826580	Intron	Dlg1
MACS_peak_2179	chr16	31969479	31969601	Intron	Senp5
MACS_peak_2182	chr16	34475463	34475652	Intron	Kalrn
MACS_peak_2183	chr16	35170260	35170416	Intron	Adcy5
MACS_peak_2184	chr16	35429495	35429643	Intron	Pdia5
MACS_peak_2185	chr16	35643657	35644041	Intron	Sema5b
MACS_peak_2186	chr16	36213856	36213995	Intron	Gm5416
MACS_peak_2189	chr16	36500901	36501026	Intron	Casr
MACS_peak_218	chr1	98454378	98454519	Intron	Slco6d1
MACS_peak_2190	chr16	36624688	36624851	Intron	Cd86
MACS_peak_2191	chr16	36836157	36836313	Intron	Eaf2
MACS_peak_2191	chr16	36836157	36836313	Intron	Iqcb1
MACS_peak_2192	chr16	37205774	37205916	Intron	Stxbp5l
MACS_peak_2193	chr16	38696188	38696368	Intron	Arhgap31
MACS_peak_2198	chr16	42789994	42790130	Intron	4932412D23Rik
MACS_peak_2200	chr16	43769364	43769723	Intron	Drd3
MACS_peak_2201	chr16	45430913	45431058	Intron	Gm609
MACS_peak_2215	chr16	50257125	50257252	Intron	Bbx
MACS_peak_2224	chr16	56604456	56604574	Intron	Abi3bp
MACS_peak_2227	chr16	59411591	59411741	Intron	Gabrr3
MACS_peak_2228	chr16	59693330	59693472	Intron	Epha6
MACS_peak_2230	chr16	60256164	60256303	Intron	Epha6
MACS_peak_2233	chr16	62772460	62772647	Intron	Nsun3
MACS_peak_2239	chr16	66924433	66924595	Intron	Cadm2
MACS_peak_2240	chr16	66950862	66950977	Intron	Cadm2
MACS_peak_2256	chr16	72917360	72917493	Intron	Robo1
MACS_peak_2275	chr16	88029579	88029711	Intron	Grik1
MACS_peak_2279	chr16	89813826	89813932	Intron	Tiam1
MACS_peak_2280	chr16	90463060	90463201	Intron	Hunk
MACS_peak_2283	chr16	91592234	91592379	Intron	Tmem50b
MACS_peak_2287	chr16	93413104	93413271	Intron	1700029J03Rik
MACS_peak_228	chr1	105542005	105542098	Intron	Pign
MACS_peak_2291	chr16	93794871	93795006	Intron	Dopey2
MACS_peak_2293	chr16	94660312	94660454	Intron	Dyrk1a
MACS_peak_2294	chr16	95509501	95509643	Intron	Erg
MACS_peak_2295	chr16	95557885	95558008	Intron	Erg
MACS_peak_2297	chr16	95920903	95921080	Intron	1600002D24Rik
MACS_peak_2299	chr16	96602346	96602474	Intron	Dscam
MACS_peak_22	chr1	16333191	16333348	Intron	Stau2
MACS_peak_2300	chr16	96966941	96967072	Intron	Dscam
MACS_peak_230	chr1	106566198	106566326	Intron	Bcl2
MACS_peak_2312	chr17	3353262	3353423	Intron	Tiam2
MACS_peak_2313	chr17	3544627	3544800	Intron	Tfb1m
MACS_peak_231	chr1	106737048	106737146	Intron	Kdsr
MACS_peak_2320	chr17	5628912	5629046	Intron	Zdhhc14
MACS_peak_2324	chr17	6685910	6686031	Intron	Sytl3
MACS_peak_2333	chr17	8619596	8619731	Intron	Pde10a
MACS_peak_2334	chr17	8770189	8770305	Intron	Pde10a
MACS_peak_2335	chr17	8973475	8973634	Intron	Pde10a
MACS_peak_2338	chr17	10931192	10931334	Intron	Park2
MACS_peak_2339	chr17	11103630	11103793	Intron	Park2
MACS_peak_2340	chr17	11287264	11287403	Intron	Park2
MACS_peak_2341	chr17	11684187	11684327	Intron	Park2
MACS_peak_2343	chr17	12416219	12416360	Intron	Plg
MACS_peak_2345	chr17	12900943	12901050	Intron	Pnldc1
MACS_peak_2349	chr17	13550585	13551530	Intron	2700054A10Rik
MACS_peak_2350	chr17	13551544	13553264	Intron	2700054A10Rik
MACS_peak_2353	chr17	14373035	14373136	Intron	Smoc2
MACS_peak_2357	chr17	15486268	15486414	Intron	Psmb1
MACS_peak_2360	chr17	15722788	15723215	Intron	Chd1
MACS_peak_2372	chr17	25629712	25629960	Intron	Lmf1
MACS_peak_2376	chr17	27077241	27077468	Intron	Itpr3
MACS_peak_2385	chr17	30874145	30874323	Intron	Dnah8
MACS_peak_2386	chr17	31104340	31104458	Intron	Abcg1
MACS_peak_2387	chr17	31233357	31233514	Intron	Ubash3a
MACS_peak_2388	chr17	31403709	31403869	Intron	Pde9a
MACS_peak_2395	chr17	33651182	33651335	Intron	Hnrnpm
MACS_peak_23	chr1	16417480	16417616	Intron	Stau2
MACS_peak_2401	chr17	34820257	34820428	Intron	C4a
MACS_peak_2416	chr17	38556828	38556999	Intron	Esp34
MACS_peak_2423	chr17	42683208	42683309	Intron	Adgrf4
MACS_peak_2426	chr17	43688130	43688265	Intron	Cyp39a1
MACS_peak_2427	chr17	43899492	43899615	Intron	Rcan2
MACS_peak_2428	chr17	44896895	44897019	Intron	Supt3
MACS_peak_2429	chr17	44994489	44994609	Intron	Supt3
MACS_peak_2431	chr17	45647743	45647857	Intron	Capn11
MACS_peak_2433	chr17	46534830	46534982	Intron	Cul9
MACS_peak_2434	chr17	47389912	47390066	Intron	Guca1b
MACS_peak_2436	chr17	47557705	47557843	Intron	Ccnd3
MACS_peak_2437	chr17	49544593	49544722	Intron	Daam2
MACS_peak_2440	chr17	50631866	50632050	Intron	Plcl2
MACS_peak_2441	chr17	50661110	50661241	Intron	Plcl2
MACS_peak_2452	chr17	56736570	56736689	Intron	Fut4-ps1
MACS_peak_2461	chr17	63077339	63077529	Intron	Fbxl17
MACS_peak_2462	chr17	63077548	63077689	Intron	Fbxl17
MACS_peak_2467	chr17	67132982	67133147	Intron	Ptprm
MACS_peak_2470	chr17	68550175	68550329	Intron	L3mbtl4
MACS_peak_2473	chr17	70467598	70467713	Intron	Dlgap1
MACS_peak_2476	chr17	72029953	72030151	Intron	Alk
MACS_peak_2477	chr17	72033338	72033490	Intron	Alk
MACS_peak_2480	chr17	73166068	73166215	Intron	Lclat1
MACS_peak_2481	chr17	73355079	73355226	Intron	Capn13
MACS_peak_248	chr1	119704443	119704607	Intron	Ptpn4
MACS_peak_2491	chr17	78587314	78587500	Intron	Vit
MACS_peak_2492	chr17	78692599	78692753	Intron	Strn
MACS_peak_2498	chr17	80155773	80155974	Intron	Galm
MACS_peak_24	chr1	16445666	16445846	Intron	Stau2
MACS_peak_2501	chr17	81590521	81590637	Intron	Slc8a1
MACS_peak_2506	chr17	84559147	84559285	Intron	Plekhh2
MACS_peak_2511	chr17	86360618	86360812	Intron	Prkce
MACS_peak_2512	chr17	86404502	86404669	Intron	Prkce
MACS_peak_2513	chr17	86454158	86454327	Intron	Prkce
MACS_peak_2518	chr17	87331672	87331796	Intron	Ttc7
MACS_peak_2520	chr17	87638572	87638721	Intron	Epcam
MACS_peak_2523	chr17	90422941	90423075	Intron	Nrxn1
MACS_peak_2524	chr17	90578914	90579072	Intron	Nrxn1
MACS_peak_253	chr1	126275574	126275718	Intron	Nckap5
MACS_peak_2540	chr18	3361372	3361524	Intron	Gm6225
MACS_peak_2544	chr18	4336260	4336435	Intron	Map3k8
MACS_peak_2545	chr18	4336512	4336644	Intron	Map3k8
MACS_peak_2547	chr18	5063039	5063186	Intron	Svil
MACS_peak_254	chr1	126275786	126275918	Intron	Nckap5
MACS_peak_2558	chr18	9316673	9316863	Intron	Ccny
MACS_peak_255	chr1	126501158	126501380	Intron	Nckap5
MACS_peak_2562	chr18	10538766	10538887	Intron	Greb1l
MACS_peak_2564	chr18	10568780	10568873	Intron	Esco1
MACS_peak_2565	chr18	10701644	10701808	Intron	Abhd3
MACS_peak_2566	chr18	11066489	11066701	Intron	Gata6
MACS_peak_256	chr1	126557399	126557527	Intron	Nckap5
MACS_peak_2570	chr18	12009649	12009788	Intron	Tmem241
MACS_peak_2571	chr18	12085035	12085216	Intron	Tmem241
MACS_peak_2572	chr18	12177727	12177887	Intron	3110002H16Rik
MACS_peak_2573	chr18	12405556	12405708	Intron	Lama3
MACS_peak_2574	chr18	12417723	12417863	Intron	Lama3
MACS_peak_2575	chr18	12470431	12470612	Intron	Lama3
MACS_peak_2576	chr18	12559169	12559356	Intron	Lama3
MACS_peak_2596	chr18	21097659	21097790	Intron	Mep1b
MACS_peak_2597	chr18	21263253	21263349	Intron	Garem1
MACS_peak_2598	chr18	22425261	22425402	Intron	Asxl3
MACS_peak_2602	chr18	24676763	24676918	Intron	Mocos
MACS_peak_2603	chr18	25547576	25547730	Intron	Celf4
MACS_peak_2613	chr18	31964829	31964990	Intron	Myo7b
MACS_peak_2615	chr18	33812634	33812781	Intron	Epb41l4a
MACS_peak_2618	chr18	34287660	34287844	Intron	Apc
MACS_peak_261	chr1	130060937	130061066	Intron	Thsd7b
MACS_peak_2621	chr18	35273326	35273501	Intron	Sil1
MACS_peak_2623	chr18	36040454	36040607	Intron	Nrg2
MACS_peak_2625	chr18	39061071	39061206	Intron	Arhgap26
MACS_peak_2626	chr18	39146072	39146160	Intron	Arhgap26
MACS_peak_2629	chr18	40342861	40342989	Intron	Kctd16
MACS_peak_262	chr1	131226507	131226657	Intron	Rassf5
MACS_peak_2634	chr18	43213220	43213376	Intron	Stk32a
MACS_peak_2635	chr18	43562602	43562791	Intron	Jakmip2
MACS_peak_2636	chr18	44336118	44336234	Intron	Myot
MACS_peak_2637	chr18	45828739	45828897	Intron	A330093E20Rik
MACS_peak_2638	chr18	46040986	46041135	Intron	A330093E20Rik
MACS_peak_2639	chr18	46879121	46879275	Intron	Lvrn
MACS_peak_2640	chr18	47070816	47070950	Intron	Commd10
MACS_peak_2645	chr18	53213858	53214006	Intron	Snx2
MACS_peak_2646	chr18	53373545	53373687	Intron	Snx24
MACS_peak_2648	chr18	53722957	53723082	Intron	Cep120
MACS_peak_2655	chr18	56558932	56559093	Intron	Aldh7a1
MACS_peak_2660	chr18	59386040	59386179	Intron	Chsy3
MACS_peak_2663	chr18	61064327	61064470	Intron	Pdgfrb
MACS_peak_2664	chr18	61120527	61120678	Intron	Csf1r
MACS_peak_2665	chr18	61138985	61139139	Intron	Hmgxb3
MACS_peak_266	chr1	132050465	132050618	Intron	Mfsd4a
MACS_peak_2670	chr18	62944525	62944651	Intron	Apcdd1
MACS_peak_2672	chr18	65017726	65017888	Intron	Nedd4l
MACS_peak_2673	chr18	65336018	65336178	Intron	Alpk2
MACS_peak_2673	chr18	65336018	65336178	Intron	Mir466p
MACS_peak_2675	chr18	65995651	65995743	Intron	Lman1
MACS_peak_2679	chr18	67112302	67112442	Intron	Gnal
MACS_peak_267	chr1	132131487	132131777	Intron	Cdk18
MACS_peak_2680	chr18	67365736	67365850	Intron	Cidea
MACS_peak_2682	chr18	67974780	67974906	Intron	Ldlrad4
MACS_peak_2685	chr18	69586707	69586902	Intron	Tcf4
MACS_peak_2686	chr18	69663393	69663541	Intron	Tcf4
MACS_peak_2695	chr18	74201155	74201299	Intron	Ska1
MACS_peak_2698	chr18	75540651	75540783	Intron	Ctif
MACS_peak_2701	chr18	76968172	76968315	Intron	Hdhd2
MACS_peak_2702	chr18	77978961	77979079	Intron	Epg5
MACS_peak_2703	chr18	78130270	78130518	Intron	Slc14a1
MACS_peak_2704	chr18	78340090	78340235	Intron	Slc14a2
MACS_peak_2705	chr18	78758254	78758368	Intron	Setbp1
MACS_peak_2706	chr18	78923112	78923295	Intron	Setbp1
MACS_peak_2713	chr18	80835110	80835315	Intron	Atp9b
MACS_peak_2718	chr18	82991866	82992008	Intron	Zfp516
MACS_peak_271	chr1	134908023	134908155	Intron	Ppp1r12b
MACS_peak_2722	chr18	84614083	84614223	Intron	Cndp1
MACS_peak_2729	chr18	89070032	89070198	Intron	Rttn
MACS_peak_272	chr1	135991590	135991740	Intron	Igfn1
MACS_peak_2736	chr19	3967728	3967835	Intron	Aldh3b3
MACS_peak_2737	chr19	4585144	4585312	Intron	Pcx
MACS_peak_2738	chr19	4644360	4644515	Intron	Gm960
MACS_peak_2739	chr19	5161775	5162067	Intron	Pacs1
MACS_peak_2740	chr19	5259784	5259932	Intron	Pacs1
MACS_peak_2741	chr19	6526836	6527004	Intron	Nrxn2
MACS_peak_2742	chr19	7605702	7605922	Intron	Lgals12
MACS_peak_2745	chr19	8364499	8364651	Intron	Slc22a30
MACS_peak_2747	chr19	8908159	8908378	Intron	Ganab
MACS_peak_2749	chr19	11682978	11683111	Intron	Oosp1
MACS_peak_2750	chr19	11704329	11704474	Intron	Oosp3
MACS_peak_2751	chr19	12143557	12143699	Intron	Mir466f-1
MACS_peak_2752	chr19	12306280	12306413	Intron	Mir466f-1
MACS_peak_2767	chr19	16142841	16143194	Intron	Gnaq
MACS_peak_2773	chr19	17515480	17515614	Intron	Pcsk5
MACS_peak_2778	chr19	19059505	19059651	Intron	Rorb
MACS_peak_2779	chr19	20811413	20811550	Intron	Tmc1
MACS_peak_2786	chr19	22320350	22320505	Intron	Trpm3
MACS_peak_2787	chr19	22600142	22600302	Intron	Trpm3
MACS_peak_2788	chr19	22603289	22603474	Intron	Trpm3
MACS_peak_2789	chr19	23399896	23400076	Intron	Mamdc2
MACS_peak_2790	chr19	23943042	23943180	Intron	Apba1
MACS_peak_2793	chr19	24757171	24757381	Intron	Pgm5
MACS_peak_2794	chr19	24763665	24763883	Intron	Pgm5
MACS_peak_2801	chr19	26657780	26657915	Intron	Smarca2
MACS_peak_2802	chr19	26786335	26786533	Intron	4931403E22Rik
MACS_peak_2805	chr19	29127056	29127214	Intron	Rcl1
MACS_peak_2808	chr19	29738430	29738698	Intron	9930021J03Rik
MACS_peak_2812	chr19	30601985	30602148	Intron	Prkg1
MACS_peak_2813	chr19	30765503	30765622	Intron	Prkg1
MACS_peak_2814	chr19	30967539	30967741	Intron	Prkg1
MACS_peak_2815	chr19	31127202	31127405	Intron	Prkg1
MACS_peak_2816	chr19	31490305	31490465	Intron	Prkg1
MACS_peak_2817	chr19	31681826	31682027	Intron	Prkg1
MACS_peak_2821	chr19	33331853	33332170	Intron	Rnls
MACS_peak_2826	chr19	34853109	34853288	Intron	Pank1
MACS_peak_2832	chr19	35983457	35983653	Intron	Htr7
MACS_peak_2834	chr19	38766285	38766491	Intron	Plce1
MACS_peak_2836	chr19	39260864	39261063	Intron	Cyp2c53-ps
MACS_peak_2837	chr19	39780349	39780486	Intron	Cyp2c40
MACS_peak_2838	chr19	40112354	40112513	Intron	Cyp2c50
MACS_peak_2840	chr19	40932063	40932231	Intron	Blnk
MACS_peak_2841	chr19	41051172	41051258	Intron	Dntt
MACS_peak_2843	chr19	41105342	41105497	Intron	Tll2
MACS_peak_2844	chr19	41154370	41154520	Intron	Tll2
MACS_peak_2845	chr19	41374661	41374975	Intron	Pik3ap1
MACS_peak_2846	chr19	41718450	41718602	Intron	Slit1
MACS_peak_2849	chr19	42184635	42184937	Intron	Zfyve27
MACS_peak_2850	chr19	42336350	42336513	Intron	Crtac1
MACS_peak_2851	chr19	42604547	42604656	Intron	Loxl4
MACS_peak_2852	chr19	42917916	42918083	Intron	Hpse2
MACS_peak_2853	chr19	43288841	43288980	Intron	Hpse2
MACS_peak_2854	chr19	43300228	43300373	Intron	Hpse2
MACS_peak_2855	chr19	43474662	43474874	Intron	Cnnm1
MACS_peak_2856	chr19	43965793	43965969	Intron	Cpn1
MACS_peak_2859	chr19	44497392	44497770	Intron	Wnt8b
MACS_peak_2863	chr19	46143536	46143679	Intron	Pitx3
MACS_peak_2864	chr19	46255350	46255517	Intron	Gbf1
MACS_peak_2865	chr19	46448397	46448533	Intron	Sufu
MACS_peak_2866	chr19	46579988	46580484	Intron	Sfxn2
MACS_peak_2867	chr19	46787211	46787542	Intron	Cnnm2
MACS_peak_2868	chr19	47376101	47376263	Intron	Sh3pxd2a
MACS_peak_2869	chr19	47981843	47981954	Intron	Cfap58
MACS_peak_2870	chr19	47987917	47988182	Intron	Cfap58
MACS_peak_2872	chr19	48218196	48218330	Intron	Sorcs3
MACS_peak_2873	chr19	48223628	48223771	Intron	Sorcs3
MACS_peak_2874	chr19	48409779	48409905	Intron	Sorcs3
MACS_peak_2875	chr19	48471818	48471953	Intron	Sorcs3
MACS_peak_2876	chr19	48692183	48692421	Intron	Sorcs3
MACS_peak_2877	chr19	48695329	48695440	Intron	Sorcs3
MACS_peak_2888	chr19	50172621	50172777	Intron	Sorcs1
MACS_peak_2908	chr19	56300556	56300765	Intron	Habp2
MACS_peak_2911	chr19	57702274	57702469	Intron	Atrnl1
MACS_peak_2912	chr19	58082779	58082969	Intron	Atrnl1
MACS_peak_2913	chr19	58113288	58113655	Intron	Atrnl1
MACS_peak_2915	chr19	58283303	58283398	Intron	Gfra1
MACS_peak_2916	chr19	58317286	58317437	Intron	Gfra1
MACS_peak_2917	chr19	58772768	58772892	Intron	Pnliprp2
MACS_peak_2918	chr19	58903210	58903335	Intron	Hspa12a
MACS_peak_2919	chr19	59226801	59226942	Intron	Kcnk18
MACS_peak_2921	chr19	59528279	59528448	Intron	2700089I24Rik
MACS_peak_2925	chr19	60924648	60924799	Intron	Grk5
MACS_peak_2937	chr1_GL456211_random	159304	159520	Intron	LOC100041034
MACS_peak_2952	chr1_GL456221_random	19611	19782	Intron	LOC664787
MACS_peak_2957	chr1_GL456221_random	118489	118864	Intron	Csprs
MACS_peak_2958	chr1_GL456221_random	121723	121930	Intron	Csprs
MACS_peak_2959	chr1_GL456221_random	128612	129006	Intron	Csprs
MACS_peak_2960	chr1_GL456221_random	147238	147399	Intron	Csprs
MACS_peak_2962	chr2	3153763	3153899	Intron	Fam171a1
MACS_peak_2963	chr2	3463421	3463575	Intron	Suv39h2
MACS_peak_296	chr1	150735222	150735344	Intron	Hmcn1
MACS_peak_2970	chr2	5453660	5453787	Intron	Camk1d
MACS_peak_2970	chr2	5453660	5453787	Intron	Mir466d
MACS_peak_2971	chr2	5654063	5654174	Intron	Camk1d
MACS_peak_2974	chr2	7285006	7285136	Intron	Celf2
MACS_peak_2975	chr2	7364753	7364911	Intron	Celf2
MACS_peak_2985	chr2	13344014	13344348	Intron	Cubn
MACS_peak_2990	chr2	15544805	15544948	Intron	Malrd1
MACS_peak_2991	chr2	15699004	15699165	Intron	Malrd1
MACS_peak_2992	chr2	15922303	15922529	Intron	Malrd1
MACS_peak_2994	chr2	17465576	17465697	Intron	Nebl
MACS_peak_2995	chr2	17614769	17614939	Intron	Nebl
MACS_peak_2998	chr2	18281210	18281336	Intron	Dnajc1
MACS_peak_2	chr1	3573976	3574108	Intron	Xkr4
MACS_peak_3001	chr2	21522535	21522665	Intron	Gpr158
MACS_peak_3002	chr2	22331382	22331559	Intron	Myo3a
MACS_peak_3003	chr2	22364980	22365123	Intron	Myo3a
MACS_peak_3004	chr2	23128215	23128382	Intron	Mastl
MACS_peak_3009	chr2	24968589	24968765	Intron	Dph7
MACS_peak_300	chr1	153412336	153412473	Intron	E330020D12Rik
MACS_peak_3011	chr2	27273231	27273383	Intron	Vav2
MACS_peak_3014	chr2	28005969	28006107	Intron	Col5a1
MACS_peak_3015	chr2	28727253	28727381	Intron	Ak8
MACS_peak_3016	chr2	28803667	28803829	Intron	Ak8
MACS_peak_3017	chr2	28811796	28811954	Intron	Ak8
MACS_peak_3019	chr2	29488859	29488995	Intron	Med27
MACS_peak_301	chr1	154585483	154585612	Intron	Cacna1e
MACS_peak_3021	chr2	30027723	30027863	Intron	Sptan1
MACS_peak_3022	chr2	30672360	30672551	Intron	Gm14486
MACS_peak_3023	chr2	31112759	31112898	Intron	Fnbp1
MACS_peak_3025	chr2	31842016	31842152	Intron	Fibcd1
MACS_peak_3027	chr2	31902049	31902191	Intron	Lamc3
MACS_peak_3030	chr2	33161865	33161973	Intron	Ralgps1
MACS_peak_3031	chr2	33590230	33590400	Intron	Lmx1b
MACS_peak_3032	chr2	33795320	33795474	Intron	Mvb12b
MACS_peak_3033	chr2	34056484	34056635	Intron	C230014O12Rik
MACS_peak_3035	chr2	34209328	34209503	Intron	Pbx3
MACS_peak_3036	chr2	34218047	34218190	Intron	Pbx3
MACS_peak_3038	chr2	37522895	37523029	Intron	Rabgap1
MACS_peak_3045	chr2	42543410	42543535	Intron	Lrp1b
MACS_peak_3047	chr2	43999976	44000144	Intron	Arhgap15
MACS_peak_3049	chr2	44785782	44785917	Intron	Gtdc1
MACS_peak_3050	chr2	44806061	44806217	Intron	Gtdc1
MACS_peak_3058	chr2	49315094	49315204	Intron	Mbd5
MACS_peak_3060	chr2	50079987	50080107	Intron	Lypd6
MACS_peak_3064	chr2	52195115	52195252	Intron	Neb
MACS_peak_3065	chr2	52296742	52296871	Intron	4930573O16Rik
MACS_peak_3065	chr2	52296742	52296871	Intron	Neb
MACS_peak_3066	chr2	52697521	52698003	Intron	Stam2
MACS_peak_3067	chr2	54836153	54836261	Intron	Galnt13
MACS_peak_3068	chr2	54913503	54913643	Intron	Galnt13
MACS_peak_306	chr1	156373101	156373261	Intron	9430070O13Rik
MACS_peak_3069	chr2	55544145	55544269	Intron	Kcnj3
MACS_peak_306	chr1	156373101	156373261	Intron	Axdnd1
MACS_peak_3073	chr2	58856628	58856783	Intron	Ccdc148
MACS_peak_3074	chr2	58950638	58950800	Intron	Ccdc148
MACS_peak_3075	chr2	59489313	59489433	Intron	Dapl1
MACS_peak_3076	chr2	59753728	59753794	Intron	Tanc1
MACS_peak_3077	chr2	59902439	59902591	Intron	Baz2b
MACS_peak_3078	chr2	59956702	59956847	Intron	Baz2b
MACS_peak_3079	chr2	60337579	60337694	Intron	Ly75
MACS_peak_307	chr1	157476551	157476707	Intron	BC026585
MACS_peak_3080	chr2	61725685	61725809	Intron	Psmd14
MACS_peak_3081	chr2	62100919	62101056	Intron	Slc4a10
MACS_peak_3082	chr2	62339116	62339303	Intron	Dpp4
MACS_peak_3083	chr2	62625043	62625172	Intron	Ifih1
MACS_peak_3088	chr2	66774663	66774806	Intron	Scn7a
MACS_peak_308	chr1	158633746	158633870	Intron	Astn1
MACS_peak_3092	chr2	67448656	67448768	Intron	Xirp2
MACS_peak_3095	chr2	69073994	69074153	Intron	Cers6
MACS_peak_3096	chr2	69458865	69458980	Intron	Lrp2
MACS_peak_3098	chr2	69711631	69711822	Intron	Fastkd1
MACS_peak_3099	chr2	69783769	69784042	Intron	Ccdc173
MACS_peak_309	chr1	158641488	158641616	Intron	Astn1
MACS_peak_3100	chr2	71049009	71049220	Intron	Mettl8
MACS_peak_3101	chr2	71573437	71573591	Intron	Mir5098
MACS_peak_3102	chr2	71638121	71638285	Intron	Mir5098
MACS_peak_3103	chr2	73754310	73754428	Intron	Chn1
MACS_peak_3105	chr2	74300965	74301068	Intron	4930441J16Rik
MACS_peak_3106	chr2	76001358	76001576	Intron	Pde11a
MACS_peak_3107	chr2	76182590	76182752	Intron	Pde11a
MACS_peak_3108	chr2	76194680	76194783	Intron	Pde11a
MACS_peak_3109	chr2	76474338	76474475	Intron	Osbpl6
MACS_peak_3113	chr2	79951759	79951913	Intron	Pde1a
MACS_peak_3132	chr2	91164446	91164590	Intron	Madd
MACS_peak_3134	chr2	92610591	92610749	Intron	Chst1
MACS_peak_3139	chr2	93986857	93987098	Intron	Alkbh3
MACS_peak_3140	chr2	94000392	94000604	Intron	Alkbh3
MACS_peak_3141	chr2	94343137	94343270	Intron	Ttc17
MACS_peak_3149	chr2	96495825	96496009	Intron	Lrrc4c
MACS_peak_314	chr1	160435236	160435390	Intron	Rabgap1l
MACS_peak_3155	chr2	102090095	102090278	Intron	Ldlrad3
MACS_peak_3156	chr2	104204287	104204414	Intron	D430041D05Rik
MACS_peak_3157	chr2	105166193	105166333	Intron	Wt1
MACS_peak_3161	chr2	106755944	106756098	Intron	Mpped2
MACS_peak_316	chr1	162120106	162120275	Intron	Dnm3
MACS_peak_3170	chr2	112603677	112603912	Intron	Aven
MACS_peak_3171	chr2	112898630	112898768	Intron	Ryr3
MACS_peak_3172	chr2	113657045	113657219	Intron	Fmn1
MACS_peak_3173	chr2	114155972	114156112	Intron	Aqr
MACS_peak_3176	chr2	115730979	115731123	Intron	BC052040
MACS_peak_3177	chr2	116039735	116039901	Intron	Meis2
MACS_peak_317	chr1	162262292	162262395	Intron	Dnm3
MACS_peak_3180	chr2	118325314	118325452	Intron	Gpr176
MACS_peak_3183	chr2	119714226	119714385	Intron	Rtf1
MACS_peak_3184	chr2	120309790	120309940	Intron	Pla2g4f
MACS_peak_3185	chr2	120393335	120393457	Intron	Tmem87a
MACS_peak_3187	chr2	124290648	124290792	Intron	Sema6d
MACS_peak_3189	chr2	125766274	125766616	Intron	Secisbp2l
MACS_peak_318	chr1	162808616	162808765	Intron	Fmo4
MACS_peak_3193	chr2	127509740	127509914	Intron	Kcnip3
MACS_peak_3194	chr2	127952136	127952296	Intron	Acoxl
MACS_peak_3198	chr2	130203948	130204057	Intron	Tmc2
MACS_peak_3199	chr2	130881242	130881373	Intron	A730017L22Rik
MACS_peak_31	chr1	17715965	17716144	Intron	Gm16070
MACS_peak_3201	chr2	132022672	132022806	Intron	Rassf2
MACS_peak_3202	chr2	132523524	132523679	Intron	1700026D11Rik
MACS_peak_3204	chr2	134613353	134613542	Intron	Tmx4
MACS_peak_3205	chr2	135266410	135266519	Intron	Plcb1
MACS_peak_3208	chr2	135834730	135834858	Intron	Plcb4
MACS_peak_3210	chr2	135956558	135956679	Intron	Plcb4
MACS_peak_3215	chr2	140615435	140615588	Intron	Macrod2
MACS_peak_3216	chr2	140802475	140802644	Intron	Macrod2
MACS_peak_3218	chr2	143725989	143726131	Intron	Pcsk2
MACS_peak_3220	chr2	145615725	145615861	Intron	Slc24a3
MACS_peak_3223	chr2	146930581	146930723	Intron	Kiz
MACS_peak_3229	chr2	149998600	149998755	Intron	Syndig1
MACS_peak_3232	chr2	151929622	151929763	Intron	Angpt4
MACS_peak_3234	chr2	152916786	152916927	Intron	Mylk2
MACS_peak_3235	chr2	152966827	152967014	Intron	Ttll9
MACS_peak_3236	chr2	153132603	153132756	Intron	Hck
MACS_peak_323	chr1	165379448	165379574	Intron	Dcaf6
MACS_peak_3241	chr2	155868894	155869056	Intron	Uqcc1
MACS_peak_3242	chr2	156280206	156280375	Intron	Phf20
MACS_peak_3243	chr2	156745351	156745560	Intron	Dlgap4
MACS_peak_3246	chr2	157324438	157324614	Intron	Rpn2
MACS_peak_3253	chr2	160958184	160958331	Intron	Chd6
MACS_peak_3254	chr2	161773910	161774041	Intron	Ptprt
MACS_peak_3255	chr2	161934006	161934167	Intron	Ptprt
MACS_peak_3256	chr2	162249536	162249674	Intron	Ptprt
MACS_peak_3258	chr2	163299338	163299475	Intron	Tox2
MACS_peak_3259	chr2	163306789	163306932	Intron	Tox2
MACS_peak_325	chr1	165821382	165821520	Intron	Cd247
MACS_peak_3267	chr2	165006980	165007174	Intron	Ncoa5
MACS_peak_3268	chr2	165413790	165413958	Intron	Slc13a3
MACS_peak_3281	chr2	169645059	169645269	Intron	Tshz2
MACS_peak_3282	chr2	169807158	169807339	Intron	Tshz2
MACS_peak_3284	chr2	170485383	170485527	Intron	Cyp24a1
MACS_peak_3286	chr2	170504992	170505317	Intron	Gm16796
MACS_peak_3286	chr2	170504992	170505317	Intron	Pfdn4
MACS_peak_3292	chr2	173636969	173637110	Intron	Ppp4r1l-ps
MACS_peak_3296	chr2	174764396	174764574	Intron	Edn3
MACS_peak_3298	chr2	175983332	175983462	Intron	Gm14391
MACS_peak_3300	chr2	178234185	178234324	Intron	Phactr3
MACS_peak_3303	chr2	180335216	180335391	Intron	Gata5os
MACS_peak_3304	chr2	181002855	181003006	Intron	Col20a1
MACS_peak_3305	chr2	181198881	181199043	Intron	Ptk6
MACS_peak_3317	chr3	5194803	5194933	Intron	2700069I18Rik
MACS_peak_3327	chr3	13626613	13626723	Intron	4930539N22Rik
MACS_peak_3327	chr3	13626613	13626723	Intron	Ralyl
MACS_peak_3328	chr3	13938668	13938827	Intron	Ralyl
MACS_peak_3330	chr3	15326089	15326258	Intron	Gm9733
MACS_peak_3340	chr3	24462832	24462967	Intron	Naaladl2
MACS_peak_3345	chr3	27201279	27201479	Intron	Nceh1
MACS_peak_3346	chr3	27323365	27323541	Intron	Tnfsf10
MACS_peak_3349	chr3	28358199	28358351	Intron	Tnik
MACS_peak_334	chr1	170924324	170924449	Intron	Fcrla
MACS_peak_3350	chr3	28375310	28375465	Intron	Tnik
MACS_peak_3351	chr3	28542966	28543127	Intron	Tnik
MACS_peak_3352	chr3	29546918	29547059	Intron	Egfem1
MACS_peak_3355	chr3	31249788	31249953	Intron	Slc7a14
MACS_peak_335	chr1	171178199	171178345	Intron	Pcp4l1
MACS_peak_3364	chr3	35608309	35608521	Intron	Gm6639
MACS_peak_3365	chr3	36052864	36052974	Intron	Ccdc144b
MACS_peak_3368	chr3	36581973	36582124	Intron	Bbs7
MACS_peak_3370	chr3	37515638	37515802	Intron	Spata5
MACS_peak_3371	chr3	37927854	37928069	Intron	Gm20755
MACS_peak_3376	chr3	40550092	40550344	Intron	Intu
MACS_peak_3388	chr3	51540914	51541064	Intron	Setd7
MACS_peak_3389	chr3	51945391	51945523	Intron	Maml3
MACS_peak_3395	chr3	53215307	53215497	Intron	Lhfp
MACS_peak_3398	chr3	54244514	54244645	Intron	Trpc4
MACS_peak_3401	chr3	55066935	55067097	Intron	4931419H13Rik
MACS_peak_3402	chr3	55118792	55118943	Intron	Spg20
MACS_peak_3404	chr3	56067141	56067301	Intron	Nbea
MACS_peak_3405	chr3	56117419	56117551	Intron	Nbea
MACS_peak_3406	chr3	56118208	56118381	Intron	Nbea
MACS_peak_3409	chr3	57772443	57772590	Intron	Rnf13
MACS_peak_3413	chr3	59341942	59342086	Intron	Igsf10
MACS_peak_3422	chr3	65367675	65367805	Intron	Kcnab1
MACS_peak_3425	chr3	67096492	67096663	Intron	Rsrc1
MACS_peak_3426	chr3	67205186	67205339	Intron	Rsrc1
MACS_peak_3428	chr3	68118068	68118168	Intron	Gm21949
MACS_peak_3428	chr3	68118068	68118168	Intron	Schip1
MACS_peak_3429	chr3	68246203	68246323	Intron	Gm21949
MACS_peak_3429	chr3	68246203	68246323	Intron	Schip1
MACS_peak_3430	chr3	68369760	68369929	Intron	Gm21949
MACS_peak_3430	chr3	68369760	68369929	Intron	Schip1
MACS_peak_3431	chr3	68956973	68957093	Intron	Ift80
MACS_peak_3432	chr3	69345583	69345727	Intron	Ppm1l
MACS_peak_3438	chr3	73223034	73223173	Intron	Gm20754
MACS_peak_3439	chr3	73550129	73550284	Intron	Gm20754
MACS_peak_3444	chr3	76390135	76390265	Intron	Fstl5
MACS_peak_3448	chr3	79440267	79440451	Intron	Gm17359
MACS_peak_3449	chr3	79893207	79893332	Intron	Fam198b
MACS_peak_3450	chr3	79916992	79917131	Intron	Fam198b
MACS_peak_3453	chr3	82099006	82099144	Intron	Gucy1a3
MACS_peak_3459	chr3	84189294	84189424	Intron	Trim2
MACS_peak_3460	chr3	84683060	84683196	Intron	Tmem154
MACS_peak_3464	chr3	86307114	86307290	Intron	Lrba
MACS_peak_3465	chr3	86878547	86878693	Intron	Dclk2
MACS_peak_3466	chr3	86910240	86910690	Intron	Dclk2
MACS_peak_3469	chr3	87731525	87731658	Intron	Arhgef11
MACS_peak_346	chr1	171564126	171564491	Intron	Cd244
MACS_peak_3475	chr3	92139397	92139596	Intron	Lelp1
MACS_peak_3478	chr3	93674324	93674456	Intron	Tdpoz1
MACS_peak_3491	chr3	103618947	103619090	Intron	Syt6
MACS_peak_3492	chr3	103998049	103998210	Intron	Phtf1
MACS_peak_3496	chr3	107239095	107239246	Intron	Prok1
MACS_peak_3498	chr3	107453299	107453466	Intron	Kcnc4
MACS_peak_3499	chr3	107479144	107479280	Intron	Slc6a17
MACS_peak_34	chr1	20431547	20431699	Intron	Pkhd1
MACS_peak_3500	chr3	107479654	107480022	Intron	Slc6a17
MACS_peak_3501	chr3	107480058	107480240	Intron	Slc6a17
MACS_peak_3502	chr3	108406408	108406571	Intron	Celsr2
MACS_peak_3508	chr3	114035673	114035824	Intron	Col11a1
MACS_peak_350	chr1	171687537	171687679	Intron	Cd48
MACS_peak_3513	chr3	115906878	115907524	Intron	Dph5
MACS_peak_3515	chr3	121238091	121238238	Intron	Tmem56
MACS_peak_3516	chr3	122059336	122059477	Intron	Abca4
MACS_peak_3517	chr3	122113396	122113576	Intron	Abca4
MACS_peak_3522	chr3	125644393	125644558	Intron	Ndst4
MACS_peak_3523	chr3	125904579	125904710	Intron	Ugt8a
MACS_peak_3524	chr3	127040371	127040512	Intron	Ank2
MACS_peak_3525	chr3	127336426	127336558	Intron	Ank2
MACS_peak_3528	chr3	130557912	130558057	Intron	Col25a1
MACS_peak_3544	chr3	138936043	138936191	Intron	Rap1gds1
MACS_peak_3546	chr3	139341276	139341403	Intron	Stpg2
MACS_peak_3551	chr3	141766146	141766267	Intron	Unc5c
MACS_peak_3552	chr3	141776342	141776505	Intron	Unc5c
MACS_peak_3558	chr3	145024860	145025043	Intron	Clca1
MACS_peak_3561	chr3	146051400	146051572	Intron	Wdr63
MACS_peak_3562	chr3	146069863	146069964	Intron	Wdr63
MACS_peak_3564	chr3	146275735	146275885	Intron	Lpar3
MACS_peak_3577	chr3	157117778	157117911	Intron	Negr1
MACS_peak_3578	chr3	157598186	157598313	Intron	Ptger3
MACS_peak_3579	chr3	157963026	157963185	Intron	Ankrd13c
MACS_peak_3580	chr3	158167402	158167550	Intron	Lrrc7
MACS_peak_3581	chr3	158253755	158253895	Intron	Lrrc7
MACS_peak_3582	chr3	158276182	158276335	Intron	Lrrc7
MACS_peak_3584	chr3	159613298	159613481	Intron	Rpe65
MACS_peak_3618	chr4	11207652	11207818	Intron	Ints8
MACS_peak_3619	chr4	11305867	11305996	Intron	Dpy19l4
MACS_peak_3621	chr4	13888062	13888189	Intron	Runx1t1
MACS_peak_3624	chr4	14267329	14267489	Intron	Gm2560
MACS_peak_3625	chr4	15136733	15136906	Intron	Necab1
MACS_peak_3630	chr4	17877245	17877408	Intron	Mmp16
MACS_peak_3635	chr4	20153979	20154132	Intron	Nkain3
MACS_peak_3636	chr4	20422521	20422745	Intron	Nkain3
MACS_peak_3637	chr4	21938154	21938269	Intron	Faxc
MACS_peak_3644	chr4	25790970	25791145	Intron	Fut9
MACS_peak_3652	chr4	30840363	30840522	Intron	4930556G01Rik
MACS_peak_3655	chr4	32011200	32011341	Intron	Map3k7
MACS_peak_3656	chr4	32478811	32478962	Intron	Bach2
MACS_peak_3658	chr4	33327578	33327784	Intron	Rngtt
MACS_peak_3666	chr4	35128716	35128916	Intron	Mob3b
MACS_peak_3669	chr4	35978981	35979113	Intron	Lingo2
MACS_peak_3670	chr4	36587602	36587779	Intron	Lingo2
MACS_peak_3676	chr4	41041210	41041333	Intron	Aqp7
MACS_peak_3677	chr4	41629594	41629745	Intron	Dnaic1
MACS_peak_367	chr1	178920746	178920887	Intron	Kif26b
MACS_peak_3683	chr4	44574584	44574720	Intron	Pax5
MACS_peak_3684	chr4	44612832	44612952	Intron	Pax5
MACS_peak_3685	chr4	44669773	44669900	Intron	Pax5
MACS_peak_3689	chr4	46869289	46869422	Intron	Gabbr2
MACS_peak_368	chr1	178981041	178981183	Intron	Smyd3
MACS_peak_3690	chr4	47103223	47103378	Intron	Galnt12
MACS_peak_3697	chr4	52604350	52604465	Intron	Toporsl
MACS_peak_369	chr1	179102756	179102885	Intron	Smyd3
MACS_peak_3700	chr4	53719588	53719719	Intron	Fktn
MACS_peak_3705	chr4	55054069	55054252	Intron	Zfp462
MACS_peak_3706	chr4	57118310	57118395	Intron	Epb41l4b
MACS_peak_3709	chr4	59740574	59740751	Intron	E130308A19Rik
MACS_peak_3710	chr4	60087390	60087506	Intron	Mup15
MACS_peak_3714	chr4	61425340	61425498	Intron	Mup2
MACS_peak_3718	chr4	63084283	63084569	Intron	Zfp618
MACS_peak_3719	chr4	63275479	63275651	Intron	Col27a1
MACS_peak_371	chr1	179563040	179563222	Intron	Cnst
MACS_peak_3720	chr4	63493775	63493885	Intron	Whrn
MACS_peak_3724	chr4	65406273	65406409	Intron	Astn2
MACS_peak_3725	chr4	65832212	65832339	Intron	Astn2
MACS_peak_3726	chr4	66078851	66078938	Intron	Astn2
MACS_peak_3727	chr4	66280498	66280621	Intron	Astn2
MACS_peak_3728	chr4	66288967	66289099	Intron	Astn2
MACS_peak_3729	chr4	66324710	66324844	Intron	Astn2
MACS_peak_373	chr1	180357256	180357433	Intron	Itpkb
MACS_peak_3742	chr4	76701572	76701708	Intron	Ptprd
MACS_peak_3746	chr4	84446778	84446899	Intron	Bnc2
MACS_peak_3747	chr4	84575386	84575510	Intron	Bnc2
MACS_peak_374	chr1	180416336	180416456	Intron	Itpkb
MACS_peak_3752	chr4	86898017	86898181	Intron	Acer2
MACS_peak_3753	chr4	87060936	87061070	Intron	Slc24a2
MACS_peak_3770	chr4	96050635	96050787	Intron	Cyp2j13
MACS_peak_3773	chr4	97570594	97570767	Intron	E130114P18Rik
MACS_peak_3775	chr4	98435553	98435741	Intron	Patj
MACS_peak_3776	chr4	98530266	98530409	Intron	Patj
MACS_peak_3777	chr4	99248495	99248758	Intron	Atg4c
MACS_peak_3787	chr4	101543870	101544000	Intron	Dnajc6
MACS_peak_3788	chr4	101736868	101737006	Intron	Lepr
MACS_peak_3789	chr4	101810156	101810288	Intron	Lepr
MACS_peak_3791	chr4	103176054	103176202	Intron	Slc35d1
MACS_peak_3792	chr4	103295436	103295614	Intron	4930456L15Rik
MACS_peak_3793	chr4	103473425	103473568	Intron	Gm12718
MACS_peak_3795	chr4	104973449	104973571	Intron	1700024P16Rik
MACS_peak_3796	chr4	104995961	104996088	Intron	1700024P16Rik
MACS_peak_3798	chr4	106726044	106726166	Intron	Mroh7
MACS_peak_3799	chr4	107274800	107275010	Intron	Hspb11
MACS_peak_37	chr1	21451770	21451921	Intron	Kcnq5
MACS_peak_3801	chr4	108171750	108171974	Intron	Echdc2
MACS_peak_3802	chr4	108239922	108240049	Intron	Zyg11b
MACS_peak_3805	chr4	109710239	109710355	Intron	Faf1
MACS_peak_3806	chr4	110554595	110554721	Intron	Agbl4
MACS_peak_3807	chr4	111111574	111111701	Intron	Agbl4
MACS_peak_3810	chr4	114414697	114414849	Intron	Trabd2b
MACS_peak_3811	chr4	114598496	114598644	Intron	Trabd2b
MACS_peak_3813	chr4	115430585	115430706	Intron	Cyp4a12b
MACS_peak_3816	chr4	116714421	116714611	Intron	Ccdc163
MACS_peak_3818	chr4	117900043	117900195	Intron	Ipo13
MACS_peak_3821	chr4	118610393	118610554	Intron	Cfap57
MACS_peak_3823	chr4	119392349	119392514	Intron	Ccdc30
MACS_peak_3824	chr4	119444449	119444607	Intron	Zmynd12
MACS_peak_3825	chr4	119917980	119918091	Intron	Hivep3
MACS_peak_382	chr1	185831990	185832122	Intron	Mir297c
MACS_peak_3832	chr4	123594383	123594569	Intron	Macf1
MACS_peak_3834	chr4	123792464	123792620	Intron	Rhbdl2
MACS_peak_3837	chr4	124469399	124469555	Intron	1700057H15Rik
MACS_peak_383	chr1	185856185	185856315	Intron	Mir297c
MACS_peak_3840	chr4	126574277	126574483	Intron	Clspn
MACS_peak_3843	chr4	128330536	128330675	Intron	Csmd2
MACS_peak_3844	chr4	128946658	128946767	Intron	Azin2
MACS_peak_3845	chr4	128950281	128950375	Intron	Azin2
MACS_peak_3847	chr4	129998297	129998418	Intron	Adgrb2
MACS_peak_384	chr1	186101796	186101934	Intron	Lyplal1
MACS_peak_3856	chr4	130932609	130932869	Intron	Laptm5
MACS_peak_3857	chr4	130932894	130933208	Intron	Laptm5
MACS_peak_3858	chr4	130933303	130933572	Intron	Laptm5
MACS_peak_3859	chr4	130933971	130934135	Intron	Laptm5
MACS_peak_3860	chr4	130934160	130934302	Intron	Laptm5
MACS_peak_3864	chr4	131822259	131822391	Intron	Ptpru
MACS_peak_3867	chr4	132998719	132998886	Intron	Fgr
MACS_peak_3868	chr4	133016788	133016942	Intron	Ahdc1
MACS_peak_3872	chr4	134077050	134077232	Intron	Aim1l
MACS_peak_3875	chr4	135218840	135219024	Intron	Clic4
MACS_peak_3877	chr4	136674254	136674393	Intron	Ephb2
MACS_peak_3879	chr4	137535741	137535895	Intron	Hspg2
MACS_peak_3881	chr4	138024340	138024545	Intron	Eif4g3
MACS_peak_3883	chr4	138605032	138605210	Intron	Vwa5b1
MACS_peak_3886	chr4	139774045	139774216	Intron	Pax7
MACS_peak_3887	chr4	140207352	140207546	Intron	Igsf21
MACS_peak_3888	chr4	140545207	140545341	Intron	Arhgef10l
MACS_peak_3889	chr4	140559536	140559662	Intron	Arhgef10l
MACS_peak_388	chr1	187170826	187170984	Intron	Spata17
MACS_peak_3890	chr4	140737014	140737143	Intron	Padi6
MACS_peak_3894	chr4	142111090	142111271	Intron	Kazn
MACS_peak_3896	chr4	143354103	143354244	Intron	Lrrc38
MACS_peak_389	chr1	188002666	188002829	Intron	Esrrg
MACS_peak_38	chr1	21756512	21756662	Intron	Kcnq5
MACS_peak_3903	chr4	145606983	145607153	Intron	Gm13212
MACS_peak_3905	chr4	145673273	145673614	Intron	Zfp980
MACS_peak_390	chr1	188644936	188645091	Intron	Ush2a
MACS_peak_3912	chr4	146459978	146460191	Intron	Zfp991
MACS_peak_3912	chr4	146459978	146460191	Intron	Zfp992
MACS_peak_3916	chr4	146541407	146541718	Intron	1700095A21Rik
MACS_peak_391	chr1	189664542	189664678	Intron	Cenpf
MACS_peak_3921	chr4	147026433	147026664	Intron	Rex2
MACS_peak_3922	chr4	147031186	147031512	Intron	Rex2
MACS_peak_3924	chr4	147199440	147199676	Intron	Zfp982
MACS_peak_3925	chr4	147210769	147211023	Intron	Zfp982
MACS_peak_3926	chr4	147261905	147262134	Intron	Zfp982
MACS_peak_3927	chr4	147338189	147338698	Intron	Zfp982
MACS_peak_3928	chr4	147398456	147398639	Intron	Zfp982
MACS_peak_3929	chr4	147401182	147401897	Intron	Zfp982
MACS_peak_3930	chr4	147408783	147409107	Intron	Zfp982
MACS_peak_3931	chr4	147425136	147426011	Intron	Zfp982
MACS_peak_3932	chr4	147431844	147432783	Intron	Zfp982
MACS_peak_3933	chr4	147450881	147451149	Intron	Zfp982
MACS_peak_3934	chr4	147452099	147452361	Intron	Zfp982
MACS_peak_3935	chr4	147482413	147482531	Intron	Zfp982
MACS_peak_3939	chr4	147698740	147698973	Intron	Zfp534
MACS_peak_3940	chr4	147756739	147756913	Intron	Zfp984
MACS_peak_3941	chr4	147766538	147766747	Intron	Zfp984
MACS_peak_3943	chr4	148888698	148888817	Intron	Casz1
MACS_peak_3949	chr4	152145364	152145516	Intron	Espn
MACS_peak_3952	chr4	154884662	154884919	Intron	Mmel1
MACS_peak_3958	chr5	4068752	4068913	Intron	Akap9
MACS_peak_3962	chr5	4843191	4843458	Intron	Cdk14
MACS_peak_3963	chr5	5011120	5011259	Intron	Cdk14
MACS_peak_3968	chr5	8137778	8137961	Intron	Adam22
MACS_peak_3969	chr5	8435990	8436125	Intron	Slc25a40
MACS_peak_3970	chr5	9147212	9147323	Intron	Dmtf1
MACS_peak_3983	chr5	14556464	14556649	Intron	Pclo
MACS_peak_3984	chr5	14664733	14664863	Intron	Pclo
MACS_peak_39	chr1	22528850	22529003	Intron	Rims1
MACS_peak_3	chr1	3668336	3668518	Intron	Xkr4
MACS_peak_4013	chr5	15689216	15689678	Intron	Speer4cos
MACS_peak_4020	chr5	17805460	17805603	Intron	Cd36
MACS_peak_4022	chr5	20242368	20242496	Intron	Magi2
MACS_peak_4024	chr5	21412125	21412241	Intron	Ccdc146
MACS_peak_4025	chr5	21540900	21541039	Intron	Fbxl13
MACS_peak_4026	chr5	21636234	21636368	Intron	Fbxl13
MACS_peak_4027	chr5	22014057	22014277	Intron	Reln
MACS_peak_4029	chr5	23037792	23037898	Intron	Lhfpl3
MACS_peak_402	chr1	192471591	192471767	Intron	Kcnh1
MACS_peak_4030	chr5	23185630	23185767	Intron	Lhfpl3
MACS_peak_4031	chr5	23271032	23271144	Intron	Lhfpl3
MACS_peak_4032	chr5	23808646	23808822	Intron	Rint1
MACS_peak_4033	chr5	23883210	23883357	Intron	Mir3471-1
MACS_peak_4039	chr5	24897189	24897307	Intron	Prkag2
MACS_peak_403	chr1	192483118	192483320	Intron	Kcnh1
MACS_peak_4042	chr5	25813037	25813216	Intron	Actr3b
MACS_peak_404	chr1	192646625	192646817	Intron	Hhat
MACS_peak_4052	chr5	27383736	27383886	Intron	Dpp6
MACS_peak_4059	chr5	29748011	29748180	Intron	Dnajb6
MACS_peak_405	chr1	192665545	192665742	Intron	Hhat
MACS_peak_4068	chr5	34137528	34137654	Intron	Poln
MACS_peak_4069	chr5	34225585	34225754	Intron	Zfyve28
MACS_peak_406	chr1	192713390	192713570	Intron	Hhat
MACS_peak_4071	chr5	35608719	35608859	Intron	Acox3
MACS_peak_4073	chr5	35878166	35878308	Intron	Ablim2
MACS_peak_4074	chr5	36229272	36229412	Intron	Sorcs2
MACS_peak_4076	chr5	37120157	37120283	Intron	Jakmip1
MACS_peak_4077	chr5	37547634	37547786	Intron	Stk32b
MACS_peak_4078	chr5	38104137	38104308	Intron	Stx18
MACS_peak_407	chr1	192752708	192752838	Intron	Hhat
MACS_peak_4081	chr5	38829603	38829743	Intron	Clnk
MACS_peak_4086	chr5	41806911	41807039	Intron	Bod1l
MACS_peak_4093	chr5	43282384	43282533	Intron	Cpeb2
MACS_peak_4094	chr5	44070363	44070508	Intron	Prom1
MACS_peak_409	chr1	192917027	192917174	Intron	Syt14
MACS_peak_40	chr1	22620880	22621039	Intron	Rims1
MACS_peak_4102	chr5	48657301	48657461	Intron	Kcnip4
MACS_peak_4105	chr5	51502099	51502233	Intron	Ppargc1a
MACS_peak_4106	chr5	51521215	51521381	Intron	Ppargc1a
MACS_peak_4112	chr5	53902753	53902947	Intron	Tbc1d19
MACS_peak_4117	chr5	57919918	57920146	Intron	Pcdh7
MACS_peak_411	chr1	194803397	194803549	Intron	Plxna2
MACS_peak_4123	chr5	63707085	63707223	Intron	Nwd2
MACS_peak_4124	chr5	63728650	63728772	Intron	Nwd2
MACS_peak_4125	chr5	63782505	63782698	Intron	Nwd2
MACS_peak_4128	chr5	64978532	64978729	Intron	Fam114a1
MACS_peak_4129	chr5	65876937	65877071	Intron	Rhoh
MACS_peak_4130	chr5	66325292	66325446	Intron	Apbb2
MACS_peak_4133	chr5	66894632	66894867	Intron	Limch1
MACS_peak_4135	chr5	67405169	67405317	Intron	Bend4
MACS_peak_4139	chr5	72241284	72241468	Intron	Atp10d
MACS_peak_4140	chr5	72336528	72336670	Intron	Corin
MACS_peak_4142	chr5	74484167	74484342	Intron	Scfd2
MACS_peak_4146	chr5	75586440	75586545	Intron	Kit
MACS_peak_4147	chr5	76145594	76145779	Intron	Srd5a3
MACS_peak_4148	chr5	76397886	76398017	Intron	Mir1191
MACS_peak_4157	chr5	79206100	79206233	Intron	Mir669m-1
MACS_peak_4159	chr5	81208438	81208569	Intron	Adgrl3
MACS_peak_4166	chr5	86546899	86547095	Intron	Tmprss11f
MACS_peak_4171	chr5	89687157	89687289	Intron	Adamts3
MACS_peak_4172	chr5	90540893	90541025	Intron	Afm
MACS_peak_4178	chr5	97908882	97909087	Intron	Antxr2
MACS_peak_4179	chr5	98867399	98867529	Intron	Bmp3
MACS_peak_4180	chr5	99502154	99502291	Intron	A930011G23Rik
MACS_peak_4181	chr5	99572503	99572732	Intron	A930011G23Rik
MACS_peak_4182	chr5	99643352	99643525	Intron	A930011G23Rik
MACS_peak_4183	chr5	99644232	99644384	Intron	A930011G23Rik
MACS_peak_4184	chr5	99644619	99644752	Intron	A930011G23Rik
MACS_peak_4185	chr5	100451536	100451709	Intron	Lin54
MACS_peak_4188	chr5	104208491	104208649	Intron	Dmp1
MACS_peak_4192	chr5	105451639	105451756	Intron	Lrrc8b
MACS_peak_4198	chr5	108227453	108227620	Intron	Ccdc18
MACS_peak_4199	chr5	108549188	108549323	Intron	Cplx1
MACS_peak_4202	chr5	110393252	110393376	Intron	Fbrsl1
MACS_peak_4210	chr5	114317840	114318028	Intron	Myo1h
MACS_peak_4212	chr5	114586978	114587134	Intron	Fam222a
MACS_peak_4213	chr5	114643590	114643767	Intron	Trpv4
MACS_peak_4217	chr5	115657441	115657614	Intron	Ccdc64
MACS_peak_4218	chr5	117673187	117673325	Intron	Ksr2
MACS_peak_4219	chr5	117685628	117685769	Intron	Ksr2
MACS_peak_421	chr10	6961419	6961538	Intron	Ipcef1
MACS_peak_421	chr10	6961419	6961538	Intron	Oprm1
MACS_peak_4220	chr5	117924135	117924288	Intron	Nos1
MACS_peak_422	chr10	7461400	7461665	Intron	Ulbp1
MACS_peak_4230	chr5	120947306	120947453	Intron	Rph3a
MACS_peak_4233	chr5	121648808	121648955	Intron	Acad10
MACS_peak_4234	chr5	122037718	122037851	Intron	Cux2
MACS_peak_4235	chr5	122045543	122045679	Intron	Cux2
MACS_peak_4237	chr5	122578714	122578888	Intron	Ift81
MACS_peak_4238	chr5	122938788	122938919	Intron	Kdm2b
MACS_peak_4239	chr5	123542098	123542215	Intron	Vps33a
MACS_peak_4240	chr5	124645747	124645903	Intron	Atp6v0a2
MACS_peak_4241	chr5	124710250	124710647	Intron	Atp6v0a2
MACS_peak_4242	chr5	124759499	124759647	Intron	Dnah10
MACS_peak_4243	chr5	124802174	124802307	Intron	Dnah10
MACS_peak_4247	chr5	128370905	128371053	Intron	Tmem132d
MACS_peak_4248	chr5	128790551	128790874	Intron	Rimbp2
MACS_peak_4251	chr5	130195177	130195340	Intron	Rabgef1
MACS_peak_4253	chr5	131869097	131869223	Intron	Auts2
MACS_peak_4254	chr5	132179480	132179623	Intron	Auts2
MACS_peak_4258	chr5	135295461	135295595	Intron	Fkbp6
MACS_peak_4259	chr5	135849786	135849930	Intron	Srrm3
MACS_peak_425	chr10	9863622	9863767	Intron	Stxbp5
MACS_peak_4260	chr5	136238504	136238678	Intron	Sh2b2
MACS_peak_4266	chr5	138237391	138237552	Intron	Nxpe5
MACS_peak_4269	chr5	140103231	140103394	Intron	Mad1l1
MACS_peak_4270	chr5	140114825	140115013	Intron	Mad1l1
MACS_peak_4271	chr5	140297575	140297699	Intron	Mad1l1
MACS_peak_4272	chr5	140432162	140432319	Intron	Eif3b
MACS_peak_4274	chr5	141735865	141736001	Intron	Sdk1
MACS_peak_4275	chr5	141912308	141912446	Intron	Sdk1
MACS_peak_4278	chr5	143002610	143002784	Intron	Rnf216
MACS_peak_427	chr10	11352639	11352839	Intron	Epm2a
MACS_peak_4281	chr5	144179597	144179721	Intron	Lmtk2
MACS_peak_4285	chr5	145158544	145158694	Intron	Ptcd1
MACS_peak_428	chr10	12407474	12407717	Intron	Utrn
MACS_peak_4298	chr5	147972014	147972149	Intron	Mtus2
MACS_peak_4299	chr5	148307603	148307769	Intron	Mtus2
MACS_peak_429	chr10	13126069	13126167	Intron	Plagl1
MACS_peak_4303	chr5	150578115	150578246	Intron	N4bp2l1
MACS_peak_4307	chr6	3575651	3575810	Intron	Vps50
MACS_peak_4312	chr6	6105378	6105505	Intron	Slc25a13
MACS_peak_4315	chr6	7010050	7010219	Intron	Sdhaf3
MACS_peak_4319	chr6	8391941	8392099	Intron	Umad1
MACS_peak_4322	chr6	12018593	12018733	Intron	Phf14
MACS_peak_432	chr10	13655457	13655603	Intron	Aig1
MACS_peak_4331	chr6	14976066	14976208	Intron	Foxp2
MACS_peak_4335	chr6	21491604	21491768	Intron	Kcnd2
MACS_peak_4337	chr6	22240581	22240704	Intron	Cped1
MACS_peak_4338	chr6	24149470	24149578	Intron	Slc13a1
MACS_peak_4342	chr6	25777956	25778182	Intron	Pot1a
MACS_peak_4345	chr6	27682429	27682560	Intron	Grm8
MACS_peak_4346	chr6	28534747	28534919	Intron	Snd1
MACS_peak_4347	chr6	28833946	28834085	Intron	Snd1
MACS_peak_4349	chr6	29554643	29554773	Intron	Tnpo3
MACS_peak_4350	chr6	29747866	29748212	Intron	Smo
MACS_peak_4351	chr6	29748225	29748745	Intron	Smo
MACS_peak_4352	chr6	29748759	29748986	Intron	Smo
MACS_peak_4353	chr6	30550918	30551074	Intron	Cpa2
MACS_peak_4354	chr6	30589290	30589418	Intron	Cpa4
MACS_peak_4358	chr6	32390871	32391018	Intron	Plxna4
MACS_peak_4359	chr6	32797995	32798175	Intron	Chchd3
MACS_peak_4360	chr6	32924603	32924758	Intron	Chchd3
MACS_peak_4361	chr6	32926451	32926572	Intron	Chchd3
MACS_peak_4363	chr6	33867721	33867855	Intron	Exoc4
MACS_peak_4364	chr6	34036376	34036498	Intron	Lrguk
MACS_peak_4371	chr6	37057469	37057609	Intron	Dgki
MACS_peak_4372	chr6	37961088	37961242	Intron	Trim24
MACS_peak_4374	chr6	39074057	39074203	Intron	Tbxas1
MACS_peak_4375	chr6	39690798	39690956	Intron	Braf
MACS_peak_4376	chr6	40140079	40140212	Intron	Tmem178b
MACS_peak_4380	chr6	41663760	41663890	Intron	Trpv5
MACS_peak_4387	chr6	45174108	45174248	Intron	Cntnap2
MACS_peak_4390	chr6	49185903	49186051	Intron	Igf2bp3
MACS_peak_4391	chr6	49426318	49426473	Intron	Stk31
MACS_peak_4399	chr6	52811090	52811250	Intron	Jazf1
MACS_peak_4402	chr6	53340986	53341102	Intron	Creb5
MACS_peak_4403	chr6	53436322	53436499	Intron	Creb5
MACS_peak_4404	chr6	54219813	54219951	Intron	Chn2
MACS_peak_4405	chr6	55244349	55244440	Intron	Fam188b
MACS_peak_4406	chr6	55280774	55280952	Intron	Fam188b
MACS_peak_4415	chr6	64298796	64298924	Intron	Grid2
MACS_peak_4416	chr6	65074325	65074477	Intron	Smarcad1
MACS_peak_4423	chr6	70769882	70769998	Intron	Rpia
MACS_peak_4426	chr6	71259177	71259316	Intron	Smyd1
MACS_peak_4428	chr6	71974465	71974595	Intron	Polr1a
MACS_peak_4430	chr6	73078645	73078819	Intron	Dnah6
MACS_peak_4436	chr6	80491627	80491745	Intron	Lrrtm4
MACS_peak_4437	chr6	80492508	80492652	Intron	Lrrtm4
MACS_peak_443	chr10	18657994	18658149	Intron	Arfgef3
MACS_peak_4441	chr6	83405424	83405569	Intron	Tet3
MACS_peak_4443	chr6	83715115	83715231	Intron	Vax2
MACS_peak_4448	chr6	88308158	88308293	Intron	Eefsec
MACS_peak_4449	chr6	88310352	88310498	Intron	Eefsec
MACS_peak_444	chr10	18717406	18717525	Intron	Arfgef3
MACS_peak_4451	chr6	89395081	89395267	Intron	Chchd6
MACS_peak_4455	chr6	90677804	90677949	Intron	Iqsec1
MACS_peak_4457	chr6	91940672	91940812	Intron	4930590J08Rik
MACS_peak_4459	chr6	92160816	92160959	Intron	Nr2c2
MACS_peak_4461	chr6	92533456	92533597	Intron	Prickle2
MACS_peak_4466	chr6	94580024	94580148	Intron	Slc25a26
MACS_peak_4467	chr6	96970398	96970538	Intron	Fam19a4
MACS_peak_4469	chr6	98257249	98257383	Intron	Gm765
MACS_peak_4474	chr6	100790296	100790438	Intron	Gxylt2
MACS_peak_4476	chr6	101295168	101295300	Intron	Pdzrn3
MACS_peak_4482	chr6	104675698	104675866	Intron	Cntn6
MACS_peak_4483	chr6	108243146	108243279	Intron	Itpr1
MACS_peak_4486	chr6	111018918	111019105	Intron	Grm7
MACS_peak_4487	chr6	111225026	111225188	Intron	Grm7
MACS_peak_4490	chr6	112374386	112374542	Intron	Ssu2
MACS_peak_4492	chr6	112789289	112789473	Intron	Srgap3
MACS_peak_4493	chr6	112868019	112868132	Intron	Srgap3
MACS_peak_4495	chr6	113881572	113881713	Intron	Atp2b2
MACS_peak_4496	chr6	114158153	114158294	Intron	Slc6a11
MACS_peak_4497	chr6	114200567	114200783	Intron	Slc6a11
MACS_peak_449	chr10	20192416	20192549	Intron	Map7
MACS_peak_4502	chr6	115183634	115183810	Intron	Syn2
MACS_peak_4504	chr6	116118002	116118151	Intron	Tmcc1
MACS_peak_4514	chr6	118689360	118689516	Intron	Cacna1c
MACS_peak_4515	chr6	120213811	120214000	Intron	B4galnt3
MACS_peak_4517	chr6	120801180	120801507	Intron	Atp6v1e1
MACS_peak_4520	chr6	124883700	124883826	Intron	Cd4
MACS_peak_4523	chr6	125366135	125366298	Intron	Plekhg6
MACS_peak_4526	chr6	126842518	126842680	Intron	Ndufa9
MACS_peak_4527	chr6	126957083	126957212	Intron	D6Wsu163e
MACS_peak_4528	chr6	127194970	127195102	Intron	9330179D12Rik
MACS_peak_4538	chr6	129614807	129614971	Intron	Klrk1
MACS_peak_4539	chr6	129871159	129871273	Intron	Klra17
MACS_peak_4557	chr6	134454425	134454571	Intron	Lrp6
MACS_peak_4558	chr6	134558688	134558888	Intron	Lrp6
MACS_peak_4559	chr6	135081257	135081431	Intron	Gprc5a
MACS_peak_4565	chr6	137356597	137356729	Intron	Ptpro
MACS_peak_456	chr10	25552184	25552380	Intron	Gm29571
MACS_peak_4571	chr6	139827527	139827663	Intron	Pik3c2g
MACS_peak_4574	chr6	142318198	142318379	Intron	Slco1a5
MACS_peak_4576	chr6	143284558	143284688	Intron	D6Ertd474e
MACS_peak_4577	chr6	143943226	143943397	Intron	Sox5
MACS_peak_4579	chr6	144680006	144680153	Intron	Sox5os3
MACS_peak_457	chr10	26234719	26234879	Intron	Samd3
MACS_peak_4582	chr6	145399432	145399552	Intron	Lmntd1
MACS_peak_4586	chr6	146423502	146423656	Intron	Itpr2
MACS_peak_4587	chr6	147262980	147263168	Intron	Pthlh
MACS_peak_4588	chr6	147626390	147626704	Intron	Ccdc91
MACS_peak_4589	chr6	148326064	148326194	Intron	Tmtc1
MACS_peak_458	chr10	26307711	26307916	Intron	L3mbtl3
MACS_peak_4590	chr6	148850686	148850802	Intron	Caprin2
MACS_peak_4597	chr7	6059636	6059842	Intron	Nlrp4c
MACS_peak_4600	chr7	7252739	7252868	Intron	Vmn2r29
MACS_peak_4606	chr7	8145638	8145810	Intron	Vmn2r41
MACS_peak_4611	chr7	8473531	8473737	Intron	Vmn2r45
MACS_peak_4627	chr7	13933326	13933482	Intron	Sult2a4
MACS_peak_4633	chr7	19643370	19643526	Intron	Clptm1
MACS_peak_4635	chr7	19971321	19971486	Intron	Ceacam20
MACS_peak_4648	chr7	22584384	22584573	Intron	Gm4565
MACS_peak_4648	chr7	22584384	22584573	Intron	LOC101055864
MACS_peak_4649	chr7	22881708	22881836	Intron	Gm6902
MACS_peak_4652	chr7	24306638	24306832	Intron	Zfp94
MACS_peak_4654	chr7	25016709	25016838	Intron	Grik5
MACS_peak_4657	chr7	27385484	27385628	Intron	Sptbn4
MACS_peak_4658	chr7	28150214	28150554	Intron	9530053A07Rik
MACS_peak_4663	chr7	30438963	30439077	Intron	Aplp1
MACS_peak_4664	chr7	30450597	30450749	Intron	Kirrel2
MACS_peak_4668	chr7	34746826	34746967	Intron	Chst8
MACS_peak_466	chr10	30658249	30658390	Intron	Ncoa7
MACS_peak_4670	chr7	35278756	35278886	Intron	Gpatch1
MACS_peak_4674	chr7	37669259	37669402	Intron	Zfp536
MACS_peak_4675	chr7	38191090	38191435	Intron	1600014C10Rik
MACS_peak_4681	chr7	40989742	40989914	Intron	4930433I11Rik
MACS_peak_4694	chr7	45795827	45795992	Intron	Lmtk3
MACS_peak_4698	chr7	49233928	49234094	Intron	Nav2
MACS_peak_4699	chr7	49366669	49366827	Intron	Nav2
MACS_peak_469	chr10	31341255	31341429	Intron	Tpd52l1
MACS_peak_46	chr1	32378566	32378702	Intron	Khdrbs2
MACS_peak_4700	chr7	49413537	49413659	Intron	Nav2
MACS_peak_4701	chr7	49465646	49465811	Intron	Nav2
MACS_peak_4702	chr7	50648213	50648345	Intron	Nell1
MACS_peak_4703	chr7	50824030	50824173	Intron	Nell1
MACS_peak_4708	chr7	55052891	55053022	Intron	Luzp2
MACS_peak_4709	chr7	55134501	55134674	Intron	Luzp2
MACS_peak_4716	chr7	59653922	59654062	Intron	Ipw
MACS_peak_472	chr10	32319227	32319341	Intron	Nkain2
MACS_peak_473	chr10	32371850	32372046	Intron	Nkain2
MACS_peak_4742	chr7	64907998	64908163	Intron	Fam189a1
MACS_peak_4743	chr7	64976833	64977007	Intron	Fam189a1
MACS_peak_4744	chr7	65675737	65675852	Intron	Tarsl2
MACS_peak_4746	chr7	66319271	66319425	Intron	Lrrk1
MACS_peak_4748	chr7	67139921	67140058	Intron	Adamts17
MACS_peak_474	chr10	32822348	32822484	Intron	Nkain2
MACS_peak_4750	chr7	68220576	68220733	Intron	Igf1r
MACS_peak_4756	chr7	70216463	70216620	Intron	Gm29683
MACS_peak_4771	chr7	78286657	78286795	Intron	Ntrk3
MACS_peak_4773	chr7	79137537	79137690	Intron	Mfge8
MACS_peak_4774	chr7	79692687	79692825	Intron	Ticrr
MACS_peak_4775	chr7	80286210	80286354	Intron	Vps33b
MACS_peak_4779	chr7	82481207	82481421	Intron	Adamtsl3
MACS_peak_4782	chr7	84316118	84316261	Intron	Arnt2
MACS_peak_4783	chr7	84718930	84719058	Intron	2610206C17Rik
MACS_peak_4789	chr7	87286200	87286321	Intron	Nox4
MACS_peak_4790	chr7	88022974	88023098	Intron	Grm5
MACS_peak_4792	chr7	89246174	89246305	Intron	Tmem135
MACS_peak_4794	chr7	92186316	92186483	Intron	Dlg2
MACS_peak_47	chr1	32442385	32442510	Intron	Khdrbs2
MACS_peak_4802	chr7	96648073	96648216	Intron	Tenm4
MACS_peak_4803	chr7	96667969	96668124	Intron	Tenm4
MACS_peak_4804	chr7	97278731	97278896	Intron	Gab2
MACS_peak_4808	chr7	99283956	99284112	Intron	Map6
MACS_peak_4809	chr7	99884058	99884210	Intron	Xrra1
MACS_peak_4810	chr7	100308502	100308617	Intron	P4ha3
MACS_peak_4811	chr7	101486925	101487053	Intron	Pde2a
MACS_peak_4821	chr7	104272054	104272221	Intron	Trim5
MACS_peak_4823	chr7	104456890	104457043	Intron	Trim30a
MACS_peak_4829	chr7	107347373	107347458	Intron	Mir1970
MACS_peak_4830	chr7	107446936	107447117	Intron	Mir1970
MACS_peak_4830	chr7	107446936	107447117	Intron	Syt9
MACS_peak_4832	chr7	110965675	110965793	Intron	Mrvi1
MACS_peak_4836	chr7	111515637	111515759	Intron	Galnt18
MACS_peak_4837	chr7	111707147	111707274	Intron	Galnt18
MACS_peak_4839	chr7	113104118	113104300	Intron	4930543E12Rik
MACS_peak_4840	chr7	113119104	113119268	Intron	4930543E12Rik
MACS_peak_4842	chr7	116141246	116141350	Intron	Plekha7
MACS_peak_4844	chr7	117545632	117545773	Intron	Xylt1
MACS_peak_4847	chr7	118439454	118439625	Intron	Syt17
MACS_peak_4850	chr7	118769329	118769483	Intron	9030624J02Rik
MACS_peak_4853	chr7	122047436	122047590	Intron	Ears2
MACS_peak_4854	chr7	122470462	122470614	Intron	Prkcb
MACS_peak_4857	chr7	123223535	123223685	Intron	Slc5a11
MACS_peak_4859	chr7	124085455	124085587	Intron	Hs3st4
MACS_peak_4863	chr7	125934624	125934733	Intron	Gsg1l
MACS_peak_4864	chr7	126104435	126104626	Intron	Xpo6
MACS_peak_4868	chr7	128188334	128188488	Intron	Itgad
MACS_peak_4869	chr7	128410965	128411160	Intron	Rgs10
MACS_peak_486	chr10	39395857	39395973	Intron	Fyn
MACS_peak_4874	chr7	130410925	130411086	Intron	Ate1
MACS_peak_4876	chr7	132109327	132109509	Intron	Cpxm2
MACS_peak_4881	chr7	133807810	133807954	Intron	Fank1
MACS_peak_4883	chr7	136980067	136980226	Intron	Mgmt
MACS_peak_4888	chr7	139148492	139148658	Intron	Stk32c
MACS_peak_4889	chr7	139518199	139518418	Intron	Inpp5a
MACS_peak_488	chr10	40596000	40596229	Intron	Slc22a16
MACS_peak_4890	chr7	139666684	139666828	Intron	Cfap46
MACS_peak_4898	chr7	143842057	143842194	Intron	Dhcr7
MACS_peak_48	chr1	32465347	32465488	Intron	Khdrbs2
MACS_peak_4900	chr7	144252040	144252189	Intron	Mir3470b
MACS_peak_4900	chr7	144252040	144252189	Intron	Shank2
MACS_peak_4901	chr7	144270376	144270512	Intron	Mir3470b
MACS_peak_4901	chr7	144270376	144270512	Intron	Shank2
MACS_peak_4902	chr7	144287877	144288001	Intron	Mir3470b
MACS_peak_4902	chr7	144287877	144288001	Intron	Shank2
MACS_peak_4903	chr7	144496236	144496395	Intron	Ppfia1
MACS_peak_4904	chr7	144597799	144597929	Intron	Ano1
MACS_peak_4908	chr8	3157321	3157438	Intron	Insr
MACS_peak_4910	chr8	3633562	3633771	Intron	Stxbp2
MACS_peak_4926	chr8	9573873	9574044	Intron	Fam155a
MACS_peak_4927	chr8	10425815	10425966	Intron	Myo16
MACS_peak_4932	chr8	12628673	12628814	Intron	Tubgcp3
MACS_peak_4933	chr8	13045836	13045991	Intron	F10
MACS_peak_4935	chr8	13369804	13369987	Intron	Tfdp1
MACS_peak_4936	chr8	13472321	13472458	Intron	Gas6
MACS_peak_4938	chr8	13717715	13717864	Intron	4932443I19Rik
MACS_peak_4939	chr8	13724003	13724141	Intron	4932443I19Rik
MACS_peak_4941	chr8	14139186	14139335	Intron	Dlgap2
MACS_peak_4942	chr8	14306675	14307413	Intron	Dlgap2
MACS_peak_4943	chr8	14842783	14842950	Intron	Dlgap2
MACS_peak_4944	chr8	14930359	14930512	Intron	Arhgef10
MACS_peak_4945	chr8	14988438	14988598	Intron	Arhgef10
MACS_peak_4948	chr8	17502653	17502786	Intron	Csmd1
MACS_peak_494	chr10	41215751	41215870	Intron	Fig4
MACS_peak_4956	chr8	19735961	19736290	Intron	4930467E23Rik
MACS_peak_4956	chr8	19735961	19736290	Intron	Gm21119
MACS_peak_4957	chr8	19750195	19750551	Intron	4930467E23Rik
MACS_peak_4957	chr8	19750195	19750551	Intron	Gm21119
MACS_peak_4958	chr8	19766606	19767570	Intron	Gm21119
MACS_peak_4959	chr8	19772166	19772884	Intron	Gm21119
MACS_peak_495	chr10	41879178	41879323	Intron	Sesn1
MACS_peak_4960	chr8	19912171	19913071	Intron	Gm21119
MACS_peak_4961	chr8	19928320	19928566	Intron	Gm21119
MACS_peak_4962	chr8	19932808	19933346	Intron	Gm21119
MACS_peak_4963	chr8	19961458	19962403	Intron	Gm21119
MACS_peak_4964	chr8	19968047	19968418	Intron	Gm21119
MACS_peak_4965	chr8	19968717	19968954	Intron	Gm21119
MACS_peak_4966	chr8	20033536	20034719	Intron	Gm21119
MACS_peak_4967	chr8	20042254	20042992	Intron	Gm21119
MACS_peak_496	chr10	42002115	42002244	Intron	Armc2
MACS_peak_497	chr10	43024424	43024575	Intron	Sobp
MACS_peak_498	chr10	43059127	43059246	Intron	Sobp
MACS_peak_4990	chr8	20627286	20627632	Intron	Gm21119
MACS_peak_499	chr10	43059617	43059754	Intron	Sobp
MACS_peak_49	chr1	32485273	32485398	Intron	Khdrbs2
MACS_peak_4	chr1	4986711	4986839	Intron	Rgs20
MACS_peak_500	chr10	43092322	43092452	Intron	Sobp
MACS_peak_5013	chr8	23146752	23146917	Intron	Ank1
MACS_peak_5013	chr8	23146752	23146917	Intron	Gm15816
MACS_peak_5015	chr8	24649491	24649627	Intron	Adam18
MACS_peak_5016	chr8	24741578	24741753	Intron	Adam5
MACS_peak_5017	chr8	24921932	24922064	Intron	Adam32
MACS_peak_5018	chr8	25162442	25162536	Intron	Tacc1
MACS_peak_501	chr10	43936500	43936693	Intron	Rtn4ip1
MACS_peak_5025	chr8	29041142	29041280	Intron	Unc5d
MACS_peak_5029	chr8	32155763	32155910	Intron	Gm8179
MACS_peak_5041	chr8	36639914	36640044	Intron	Dlc1
MACS_peak_5043	chr8	38221409	38221551	Intron	Sgcz
MACS_peak_5044	chr8	39746029	39746171	Intron	Mir669e
MACS_peak_5045	chr8	40363723	40363951	Intron	Micu3
MACS_peak_5046	chr8	40444226	40444381	Intron	Zdhhc2
MACS_peak_5047	chr8	41026674	41026813	Intron	Mtus1
MACS_peak_504	chr10	45417538	45417699	Intron	Lin28b
MACS_peak_5055	chr8	46102397	46102569	Intron	Snx25
MACS_peak_5057	chr8	47003137	47003296	Intron	Enpp6
MACS_peak_5059	chr8	47268593	47268734	Intron	Stox2
MACS_peak_5077	chr8	54652176	54652311	Intron	Wdr17
MACS_peak_5078	chr8	54935748	54935868	Intron	Gpm6a
MACS_peak_5100	chr8	61070608	61070723	Intron	Nek1
MACS_peak_5102	chr8	62032114	62032258	Intron	Ddx60
MACS_peak_5104	chr8	64834780	64834977	Intron	Klhl2
MACS_peak_5107	chr8	65015070	65015221	Intron	Trim60
MACS_peak_5107	chr8	65015070	65015221	Intron	Trim61
MACS_peak_5109	chr8	65102025	65102191	Intron	BC030870
MACS_peak_5114	chr8	66057613	66057769	Intron	2016-03-01
MACS_peak_5115	chr8	66085509	66085670	Intron	2016-03-01
MACS_peak_5116	chr8	66303712	66303867	Intron	2016-03-01
MACS_peak_5121	chr8	67698921	67699076	Intron	Psd3
MACS_peak_5122	chr8	68343062	68343288	Intron	Sh2d4a
MACS_peak_5132	chr8	70062851	70063057	Intron	Sugp1
MACS_peak_5133	chr8	70335948	70336081	Intron	Upf1
MACS_peak_5147	chr8	72870501	72870707	Intron	Large1
MACS_peak_5148	chr8	73095604	73095810	Intron	Large1
MACS_peak_5154	chr8	77164492	77164661	Intron	Nr3c2
MACS_peak_5156	chr8	78296043	78296270	Intron	Ttc29
MACS_peak_5165	chr8	80026926	80027044	Intron	Hhip
MACS_peak_5167	chr8	82945880	82946022	Intron	Rnf150
MACS_peak_5168	chr8	83200529	83200767	Intron	Tbc1d9
MACS_peak_5169	chr8	83678379	83678600	Intron	Pkn1
MACS_peak_5170	chr8	83915660	83915769	Intron	Adgrl1
MACS_peak_5171	chr8	84099774	84099879	Intron	Dcaf15
MACS_peak_5172	chr8	84456160	84456309	Intron	Cacna1a
MACS_peak_5173	chr8	84714833	84714961	Intron	Nfix
MACS_peak_5177	chr8	88254535	88254839	Intron	Papd5
MACS_peak_5185	chr8	92972584	92972745	Intron	Slc6a2
MACS_peak_5187	chr8	93914486	93914669	Intron	Gnao1
MACS_peak_5188	chr8	94584894	94585176	Intron	Fam192a
MACS_peak_5189	chr8	95076766	95076947	Intron	Drc7
MACS_peak_518	chr10	52067929	52068068	Intron	Ros1
MACS_peak_5195	chr8	102685787	102685941	Intron	Cdh11
MACS_peak_5196	chr8	102686874	102687078	Intron	Cdh11
MACS_peak_51	chr1	33608125	33608277	Intron	Prim2
MACS_peak_5200	chr8	104621737	104621877	Intron	Cdh16
MACS_peak_5204	chr8	105776670	105776812	Intron	Ranbp10
MACS_peak_5210	chr8	110571071	110571216	Intron	Hydin
MACS_peak_5211	chr8	110571443	110571579	Intron	Hydin
MACS_peak_5212	chr8	110922971	110923068	Intron	St3gal2
MACS_peak_5214	chr8	111110607	111110728	Intron	Pdpr
MACS_peak_5215	chr8	111502684	111502825	Intron	Wdr59
MACS_peak_5219	chr8	113711607	113711735	Intron	Adamts18
MACS_peak_521	chr10	52970798	52970933	Intron	Slc35f1
MACS_peak_5221	chr8	114250558	114250716	Intron	Vat1l
MACS_peak_5222	chr8	114477292	114477422	Intron	Wwox
MACS_peak_5223	chr8	114528954	114529082	Intron	Wwox
MACS_peak_5224	chr8	114649315	114649498	Intron	Wwox
MACS_peak_5225	chr8	114758937	114759042	Intron	Wwox
MACS_peak_5226	chr8	115241793	115241915	Intron	Wwox
MACS_peak_522	chr10	53968915	53969051	Intron	Man1a
MACS_peak_5230	chr8	116601264	116601429	Intron	Cdyl2
MACS_peak_5233	chr8	117048232	117048434	Intron	Pkd1l2
MACS_peak_5236	chr8	118368686	118368896	Intron	Cdh13
MACS_peak_5237	chr8	119146105	119146259	Intron	Cdh13
MACS_peak_5238	chr8	119685052	119685308	Intron	Wfdc1
MACS_peak_5240	chr8	120522343	120522478	Intron	Gse1
MACS_peak_5247	chr8	121749694	121749839	Intron	Jph3
MACS_peak_5248	chr8	121808688	121808837	Intron	Klhdc4
MACS_peak_5251	chr8	122657006	122657170	Intron	Cbfa2t3
MACS_peak_5253	chr8	122913198	122913461	Intron	Ankrd11
MACS_peak_5257	chr8	124264461	124264551	Intron	Galnt2
MACS_peak_5258	chr8	124396625	124396849	Intron	Pgbd5
MACS_peak_5260	chr8	124580526	124580715	Intron	Capn9
MACS_peak_5261	chr8	125160477	125160648	Intron	Disc1
MACS_peak_5262	chr8	125240302	125240476	Intron	Disc1
MACS_peak_5263	chr8	125437111	125437323	Intron	Sipa1l2
MACS_peak_5264	chr8	125769258	125769397	Intron	Pcnx2
MACS_peak_5269	chr9	3441524	3441703	Intron	Cwf19l2
MACS_peak_5271	chr9	6283122	6283227	Intron	Pdgfd
MACS_peak_5276	chr9	9870787	9870936	Intron	Cntn5
MACS_peak_5284	chr9	22701035	22701170	Intron	Bbs9
MACS_peak_5285	chr9	22794013	22794221	Intron	Bbs9
MACS_peak_5286	chr9	23365907	23366031	Intron	Bmper
MACS_peak_5287	chr9	24278915	24279061	Intron	Npsr1
MACS_peak_5288	chr9	24657432	24657532	Intron	Dpy19l2
MACS_peak_5290	chr9	27337424	27337588	Intron	Igsf9b
MACS_peak_5292	chr9	27793703	27793892	Intron	Opcml
MACS_peak_5293	chr9	27974519	27974676	Intron	Opcml
MACS_peak_5294	chr9	28141810	28141949	Intron	Opcml
MACS_peak_5295	chr9	28561770	28561870	Intron	Opcml
MACS_peak_5298	chr9	30460913	30461052	Intron	Snx19
MACS_peak_52	chr1	33625948	33626073	Intron	Prim2
MACS_peak_5307	chr9	34814210	34814349	Intron	Kirrel3
MACS_peak_5308	chr9	34816598	34816736	Intron	Kirrel3
MACS_peak_5309	chr9	35227799	35227965	Intron	Fam118b
MACS_peak_5313	chr9	40401520	40401661	Intron	Gramd1b
MACS_peak_5315	chr9	40949069	40949199	Intron	Jhy
MACS_peak_5316	chr9	41050101	41050249	Intron	Ubash3b
MACS_peak_5321	chr9	41414785	41414909	Intron	3110039I08Rik
MACS_peak_5322	chr9	42019431	42019553	Intron	Sorl1
MACS_peak_5323	chr9	42189229	42189380	Intron	4930546K05Rik
MACS_peak_5325	chr9	42334812	42334962	Intron	Tecta
MACS_peak_5326	chr9	42631547	42631688	Intron	Grik4
MACS_peak_5327	chr9	42665823	42665963	Intron	Grik4
MACS_peak_5328	chr9	42828816	42828946	Intron	Grik4
MACS_peak_5331	chr9	43018688	43019560	Intron	Arhgef12
MACS_peak_5340	chr9	45420845	45421006	Intron	4833428L15Rik
MACS_peak_5344	chr9	47787017	47787161	Intron	Cadm1
MACS_peak_5345	chr9	47818357	47818524	Intron	Cadm1
MACS_peak_534	chr10	57699571	57699692	Intron	Pkib
MACS_peak_5351	chr9	48727070	48727211	Intron	Zbtb16
MACS_peak_5353	chr9	49784579	49784765	Intron	Ncam1
MACS_peak_5359	chr9	54385161	54385317	Intron	Dmxl2
MACS_peak_5360	chr9	55393377	55393497	Intron	Tmem266
MACS_peak_5361	chr9	55492517	55492667	Intron	Etfa
MACS_peak_5362	chr9	55493383	55493539	Intron	Etfa
MACS_peak_5363	chr9	55767391	55767512	Intron	Scaper
MACS_peak_5368	chr9	58074433	58074566	Intron	Ccdc33
MACS_peak_5371	chr9	60034155	60034323	Intron	Thsd4
MACS_peak_5377	chr9	63289572	63289723	Intron	Map2k5
MACS_peak_5378	chr9	63665813	63665994	Intron	Smad3
MACS_peak_5382	chr9	64513561	64513754	Intron	Megf11
MACS_peak_5384	chr9	66116888	66117194	Intron	Snx1
MACS_peak_5385	chr9	66888511	66888682	Intron	Rab8b
MACS_peak_5386	chr9	67349595	67349716	Intron	Tln2
MACS_peak_5388	chr9	68937163	68937317	Intron	Rora
MACS_peak_5389	chr9	68937771	68937890	Intron	Rora
MACS_peak_5390	chr9	69367660	69367795	Intron	Rora
MACS_peak_5394	chr9	71191083	71191228	Intron	Gm32511
MACS_peak_5395	chr9	71196407	71196543	Intron	Gm32511
MACS_peak_5400	chr9	72341641	72341844	Intron	Zfp280d
MACS_peak_5401	chr9	72522915	72523065	Intron	4930509E16Rik
MACS_peak_5402	chr9	72528405	72528557	Intron	4930509E16Rik
MACS_peak_5403	chr9	72898602	72898755	Intron	Prtg
MACS_peak_5404	chr9	73010852	73011005	Intron	Ccpg1
MACS_peak_5405	chr9	73019571	73019703	Intron	Pigb
MACS_peak_5407	chr9	73543949	73544119	Intron	Unc13c
MACS_peak_5409	chr9	75801612	75801740	Intron	Bmp5
MACS_peak_5410	chr9	76094799	76094941	Intron	Hmgcll1
MACS_peak_5412	chr9	77522625	77522822	Intron	Lrrc1
MACS_peak_5427	chr9	87045560	87045692	Intron	Cyb5r4
MACS_peak_5430	chr9	87212324	87212492	Intron	Cep162
MACS_peak_5433	chr9	88354134	88354340	Intron	Nt5e
MACS_peak_5436	chr9	89955841	89955968	Intron	Rasgrf1
MACS_peak_5437	chr9	89988072	89988255	Intron	Rasgrf1
MACS_peak_5446	chr9	97707306	97707442	Intron	Clstn2
MACS_peak_5447	chr9	97823125	97823282	Intron	Clstn2
MACS_peak_5448	chr9	97891423	97891580	Intron	Clstn2
MACS_peak_5449	chr9	98403988	98404201	Intron	Nmnat3
MACS_peak_5450	chr9	99472673	99472769	Intron	1600029I14Rik
MACS_peak_5450	chr9	99472673	99472769	Intron	Nme9
MACS_peak_5453	chr9	100467401	100467543	Intron	Il20rb
MACS_peak_5454	chr9	101980136	101980300	Intron	Ephb1
MACS_peak_5455	chr9	102002265	102002398	Intron	Ephb1
MACS_peak_5459	chr9	103140151	103140283	Intron	Rab6b
MACS_peak_5460	chr9	103526225	103526356	Intron	Tmem108
MACS_peak_5464	chr9	105679833	105679992	Intron	Pik3r4
MACS_peak_5465	chr9	105706626	105706784	Intron	Col6a6
MACS_peak_5467	chr9	106343372	106343535	Intron	Poc1a
MACS_peak_5469	chr9	108214565	108214733	Intron	Dag1
MACS_peak_546	chr10	59082811	59082939	Intron	Sh3rf3
MACS_peak_5470	chr9	108357056	108357197	Intron	Usp4
MACS_peak_5473	chr9	109331323	109331464	Intron	Fbxw28
MACS_peak_5474	chr9	109683820	109683975	Intron	Fbxw18
MACS_peak_5476	chr9	110443683	110444034	Intron	Klhl18
MACS_peak_5477	chr9	110444732	110445066	Intron	Klhl18
MACS_peak_5478	chr9	110446053	110446259	Intron	Klhl18
MACS_peak_5479	chr9	110646744	110646884	Intron	Nbeal2
MACS_peak_5486	chr9	113866614	113866730	Intron	Clasp2
MACS_peak_5487	chr9	113997022	113997177	Intron	Fbxl2
MACS_peak_5491	chr9	115341699	115341813	Intron	4930428G15Rik
MACS_peak_5492	chr9	116058333	116058498	Intron	Gadl1
MACS_peak_549	chr10	60748577	60748695	Intron	Slc29a3
MACS_peak_54	chr1	33915845	33915998	Intron	Dst
MACS_peak_5502	chr9	121047374	121047533	Intron	Ulk4
MACS_peak_5503	chr9	121147491	121147620	Intron	Ulk4
MACS_peak_5504	chr9	121659487	121659616	Intron	Vipr1
MACS_peak_5505	chr9	122162974	122163122	Intron	Snrk
MACS_peak_5506	chr9	122780164	122780321	Intron	Topaz1
MACS_peak_5509	chr9	123402055	123402248	Intron	Lars2
MACS_peak_551	chr10	61524484	61524672	Intron	Lrrc20
MACS_peak_5545	chrX	12120165	12120273	Intron	Bcor
MACS_peak_554	chr10	62400725	62400860	Intron	Hkdc1
MACS_peak_5552	chrX	20850685	20850849	Intron	Araf
MACS_peak_5559	chrX	28937336	28937462	Intron	Gm10058
MACS_peak_5559	chrX	28937336	28937462	Intron	Gm10096
MACS_peak_5559	chrX	28937336	28937462	Intron	Gm10147
MACS_peak_5559	chrX	28937336	28937462	Intron	Gm10230
MACS_peak_5559	chrX	28937336	28937462	Intron	Gm10486
MACS_peak_5559	chrX	28937336	28937462	Intron	Gm10487
MACS_peak_5559	chrX	28937336	28937462	Intron	Gm10488
MACS_peak_5559	chrX	28937336	28937462	Intron	Gm14632
MACS_peak_5559	chrX	28937336	28937462	Intron	Gm14819
MACS_peak_5559	chrX	28937336	28937462	Intron	Gm4836
MACS_peak_555	chr10	63313149	63313331	Intron	Herc4
MACS_peak_556	chr10	63780013	63780207	Intron	Ctnna3
MACS_peak_5578	chrX	42766828	42766982	Intron	Tenm1
MACS_peak_557	chr10	64192674	64192807	Intron	Ctnna3
MACS_peak_558	chr10	64295765	64295919	Intron	Ctnna3
MACS_peak_5590	chrX	69936713	69936847	Intron	1700111N16Rik
MACS_peak_5592	chrX	71485090	71485223	Intron	Cd99l2
MACS_peak_5598	chrX	77316118	77316236	Intron	Mir669m-2
MACS_peak_559	chr10	64571686	64571866	Intron	Ctnna3
MACS_peak_5600	chrX	84852176	84852317	Intron	Dmd
MACS_peak_5604	chrX	92319403	92319541	Intron	Mageb18
MACS_peak_5609	chrX	96352114	96352255	Intron	Hsf3
MACS_peak_5612	chrX	98228051	98228206	Intron	Ar
MACS_peak_5613	chrX	100864606	100864766	Intron	Tex11
MACS_peak_5614	chrX	104168440	104168538	Intron	C77370
MACS_peak_5615	chrX	106701494	106701631	Intron	Gm5127
MACS_peak_5624	chrX	135049192	135049385	Intron	3632454L22Rik
MACS_peak_5625	chrX	135051082	135051296	Intron	3632454L22Rik
MACS_peak_5626	chrX	135054563	135054673	Intron	3632454L22Rik
MACS_peak_5629	chrX	144928457	144928606	Intron	Zcchc16
MACS_peak_5634	chrX	157259141	157259386	Intron	Phex
MACS_peak_5635	chrX	157260518	157260641	Intron	Phex
MACS_peak_5637	chrX	160695230	160695343	Intron	Ppef1
MACS_peak_566	chr10	70573635	70573762	Intron	Phyhipl
MACS_peak_574	chr10	74962902	74963019	Intron	Rsph14
MACS_peak_575	chr10	76363909	76364126	Intron	Pcnt
MACS_peak_585	chr10	80310431	80310567	Intron	Apc2
MACS_peak_585	chr10	80310431	80310567	Intron	Bc1
MACS_peak_586	chr10	80696205	80696368	Intron	Mob3a
MACS_peak_587	chr10	80860776	80860969	Intron	Sppl2b
MACS_peak_58	chr1	34822235	34822375	Intron	Fam168b
MACS_peak_593	chr10	83091382	83091572	Intron	Chst11
MACS_peak_598	chr10	84847896	84848085	Intron	Rfx4
MACS_peak_599	chr10	84854207	84854356	Intron	Rfx4
MACS_peak_601	chr10	85880513	85880632	Intron	Pwp1
MACS_peak_602	chr10	86142136	86142258	Intron	Syn3
MACS_peak_603	chr10	86162976	86163127	Intron	Syn3
MACS_peak_604	chr10	86226145	86226275	Intron	Syn3
MACS_peak_605	chr10	86232956	86233082	Intron	Syn3
MACS_peak_606	chr10	86240540	86240698	Intron	Syn3
MACS_peak_616	chr10	89670319	89670420	Intron	Scyl2
MACS_peak_617	chr10	90670465	90670607	Intron	Anks1b
MACS_peak_618	chr10	92139226	92139338	Intron	Rmst
MACS_peak_619	chr10	92177161	92177304	Intron	Gm20757
MACS_peak_61	chr1	36384131	36384254	Intron	Fer1l5
MACS_peak_620	chr10	92879420	92879550	Intron	Cfap54
MACS_peak_621	chr10	93217470	93217678	Intron	Cdk17
MACS_peak_623	chr10	95425116	95425258	Intron	5730420D15Rik
MACS_peak_626	chr10	97877297	97877420	Intron	Gm10754
MACS_peak_627	chr10	97963474	97963628	Intron	Gm10754
MACS_peak_63	chr1	37326103	37326306	Intron	Inpp4a
MACS_peak_640	chr10	106698490	106698649	Intron	Ppfia2
MACS_peak_64	chr1	37647901	37648055	Intron	2010300C02Rik
MACS_peak_642	chr10	108645255	108645395	Intron	Syt1
MACS_peak_648	chr10	112192771	112192918	Intron	Caps2
MACS_peak_657	chr10	114479882	114480050	Intron	Trhde
MACS_peak_658	chr10	115535568	115535686	Intron	Lgr5
MACS_peak_65	chr1	37952214	37952383	Intron	Lyg1
MACS_peak_663	chr10	116844763	116844900	Intron	Myrfl
MACS_peak_667	chr10	120162841	120162954	Intron	Irak3
MACS_peak_66	chr1	38475705	38475816	Intron	Aff3
MACS_peak_670	chr10	121674104	121674244	Intron	D930020B18Rik
MACS_peak_674	chr10	123149768	123149917	Intron	Usp15
MACS_peak_675	chr10	123434394	123434512	Intron	Fam19a2
MACS_peak_678	chr10	125973009	125973171	Intron	Lrig3
MACS_peak_679	chr10	127262343	127262579	Intron	Kif5a
MACS_peak_67	chr1	38817688	38817810	Intron	Lonrf2
MACS_peak_681	chr10	127648646	127648793	Intron	Stat6
MACS_peak_688	chr11	3263064	3263313	Intron	Drg1
MACS_peak_688	chr11	3263064	3263313	Intron	Mir3470a
MACS_peak_68	chr1	39340524	39340661	Intron	Npas2
MACS_peak_691	chr11	4558620	4558750	Intron	Mtmr3
MACS_peak_693	chr11	5314139	5314318	Intron	Znrf3
MACS_peak_695	chr11	5925344	5925481	Intron	Gck
MACS_peak_696	chr11	6160717	6160877	Intron	Nudcd3
MACS_peak_69	chr1	40734591	40734748	Intron	Slc9a2
MACS_peak_704	chr11	11425881	11426035	Intron	Zpbp
MACS_peak_705	chr11	12262007	12262153	Intron	Cobl
MACS_peak_706	chr11	12434051	12434208	Intron	Cobl
MACS_peak_70	chr1	40742395	40742518	Intron	Slc9a2
MACS_peak_716	chr11	21308877	21309047	Intron	Vps54
MACS_peak_717	chr11	21670087	21670340	Intron	Wdpcp
MACS_peak_71	chr1	40761234	40761404	Intron	Slc9a2
MACS_peak_728	chr11	26568904	26569053	Intron	Vrk2
MACS_peak_729	chr11	28504796	28504930	Intron	Ccdc85a
MACS_peak_730	chr11	29910398	29910582	Intron	Eml6
MACS_peak_731	chr11	30448010	30448143	Intron	4930505A04Rik
MACS_peak_732	chr11	31922652	31922856	Intron	Cpeb4
MACS_peak_733	chr11	32256724	32256865	Intron	Nprl3
MACS_peak_736	chr11	33562408	33562551	Intron	Gabrp
MACS_peak_737	chr11	33683309	33683479	Intron	Kcnip1
MACS_peak_738	chr11	33698103	33698287	Intron	Kcnip1
MACS_peak_739	chr11	33727849	33728041	Intron	Kcnip1
MACS_peak_740	chr11	33728316	33728536	Intron	Kcnip1
MACS_peak_741	chr11	33804427	33804565	Intron	Kcnip1
MACS_peak_742	chr11	33934255	33934393	Intron	Kcnip1
MACS_peak_743	chr11	34494327	34494495	Intron	Dock2
MACS_peak_744	chr11	35505644	35505790	Intron	Slit3
MACS_peak_745	chr11	35580920	35581035	Intron	Slit3
MACS_peak_746	chr11	35603571	35603705	Intron	Slit3
MACS_peak_748	chr11	36172297	36172425	Intron	Tenm2
MACS_peak_758	chr11	44462540	44462811	Intron	Ublcp1
MACS_peak_760	chr11	44963691	44963809	Intron	Ebf1
MACS_peak_761	chr11	45814019	45814124	Intron	F630206G17Rik
MACS_peak_762	chr11	45891470	45891720	Intron	Clint1
MACS_peak_766	chr11	47855722	47855873	Intron	Mir6380
MACS_peak_768	chr11	49831077	49831226	Intron	Gfpt2
MACS_peak_769	chr11	49951043	49951185	Intron	Rasgef1c
MACS_peak_773	chr11	51508982	51509123	Intron	Col23a1
MACS_peak_775	chr11	51839380	51839532	Intron	Jade2
MACS_peak_778	chr11	52936508	52936680	Intron	Fstl4
MACS_peak_779	chr11	52976515	52976678	Intron	Fstl4
MACS_peak_780	chr11	53526485	53526832	Intron	2016-09-08
MACS_peak_782	chr11	54353301	54353516	Intron	Acsl6
MACS_peak_783	chr11	54353858	54353981	Intron	Acsl6
MACS_peak_791	chr11	59991418	59991546	Intron	Pemt
MACS_peak_798	chr11	62261337	62261460	Intron	Adora2b
MACS_peak_7	chr1	6693580	6693743	Intron	St18
MACS_peak_807	chr11	67652550	67652704	Intron	Gas7
MACS_peak_808	chr11	67658155	67658321	Intron	Gas7
MACS_peak_809	chr11	67779627	67779782	Intron	Gsg1l2
MACS_peak_812	chr11	68785462	68785600	Intron	Myh10
MACS_peak_813	chr11	69163674	69163817	Intron	Alox12b
MACS_peak_819	chr11	72103872	72104113	Intron	Pitpnm3
MACS_peak_81	chr1	46461502	46461636	Intron	Dnah7c
MACS_peak_820	chr11	73120670	73120804	Intron	Itgae
MACS_peak_821	chr11	73709466	73709579	Intron	Zfp735
MACS_peak_824	chr11	76356200	76356336	Intron	Nxn
MACS_peak_825	chr11	76436947	76437094	Intron	Abr
MACS_peak_826	chr11	77020483	77020610	Intron	Slc6a4
MACS_peak_82	chr1	46563682	46563888	Intron	Dnah7c
MACS_peak_830	chr11	80175637	80175834	Intron	Adap2
MACS_peak_831	chr11	80347578	80347752	Intron	Rhbdl3
MACS_peak_832	chr11	80374434	80374561	Intron	5730455P16Rik
MACS_peak_833	chr11	81060286	81060412	Intron	Asic2
MACS_peak_834	chr11	81743136	81743310	Intron	Asic2
MACS_peak_836	chr11	83595076	83595260	Intron	E230016K23Rik
MACS_peak_837	chr11	84264257	84264378	Intron	Acaca
MACS_peak_839	chr11	85360225	85360432	Intron	Bcas3
MACS_peak_83	chr1	46571360	46571492	Intron	Dnah7c
MACS_peak_840	chr11	85542248	85542384	Intron	Bcas3
MACS_peak_841	chr11	85821005	85821150	Intron	2610027K06Rik
MACS_peak_841	chr11	85821005	85821150	Intron	Bcas3
MACS_peak_842	chr11	85827945	85828115	Intron	2610027K06Rik
MACS_peak_843	chr11	87366173	87366283	Intron	Mir8115
MACS_peak_846	chr11	89081621	89082007	Intron	Gm525
MACS_peak_852	chr11	95023770	95023864	Intron	Samd14
MACS_peak_856	chr11	97107626	97107760	Intron	Tbx21
MACS_peak_857	chr11	97671620	97671794	Intron	Mllt6
MACS_peak_858	chr11	98095838	98096001	Intron	Fbxl20
MACS_peak_859	chr11	98248353	98248476	Intron	Cdk12
MACS_peak_861	chr11	100785491	100785588	Intron	Stat5b
MACS_peak_862	chr11	102066376	102066521	Intron	Mpp2
MACS_peak_865	chr11	103571783	103571910	Intron	Gm884
MACS_peak_866	chr11	103737561	103737703	Intron	Wnt9b
MACS_peak_868	chr11	105405732	105405878	Intron	2016-03-10
MACS_peak_871	chr11	105704184	105704289	Intron	Tanc2
MACS_peak_872	chr11	105838211	105838320	Intron	Tanc2
MACS_peak_874	chr11	106529903	106530066	Intron	Tex2
MACS_peak_877	chr11	107954697	107954851	Intron	Prkca
MACS_peak_879	chr11	109274729	109274870	Intron	Rgs9
MACS_peak_889	chr11	114573770	114573939	Intron	Mir466n
MACS_peak_890	chr11	114729940	114730074	Intron	Dnaic2
MACS_peak_890	chr11	114729940	114730074	Intron	Mir466n
MACS_peak_893	chr11	116826080	116826219	Intron	Mxra7
MACS_peak_897	chr11	117746791	117746948	Intron	Tnrc6c
MACS_peak_898	chr11	118892748	118892892	Intron	Rbfox3
MACS_peak_901	chr11	119372028	119372186	Intron	Slc26a11
MACS_peak_902	chr11	119506558	119506769	Intron	Endov
MACS_peak_903	chr11	119760581	119760746	Intron	Rptor
MACS_peak_906	chr12	3889290	3889480	Intron	Dnmt3a
MACS_peak_907	chr12	4264184	4264295	Intron	Ncoa1
MACS_peak_919	chr12	8557792	8557929	Intron	Slc7a15
MACS_peak_91	chr1	52681981	52682168	Intron	Mfsd6
MACS_peak_920	chr12	9015316	9015458	Intron	Wdr35
MACS_peak_928	chr12	11147956	11148097	Intron	Kcns3
MACS_peak_929	chr12	12285511	12285679	Intron	Fam49a
MACS_peak_931	chr12	13282588	13282714	Intron	Nbas
[truncated: 3,825 more rows]
