# Supplementary material for: Y-box Protein-1 Regulates the Expression of Collagen I in Hepatic Progenitor Cells via PDGFR-β/ERK/p90RSK Signalling
Source: Stem Cells Int. 2017 Aug 27;2017:6193106. doi: 10.1155/2017/6193106 (PMC5591999; doi:10.1155/2017/6193106)
Supplement: Supplementary file 2 [file 6193106.f2.xlsx]

## Sheet: Supplementary Table 2
GeneName	GFOLD	log2-fold change	YB-1 KD-RPKM	scramble-RPKM
1110032A03Rik	0.220329	0.610013	3.9388	5.89787
1700020D05Rik	0.447182	2.55604	0.0633542	0.662977
1700071M16Rik	0.212224	2.21208	0.0515638	0.323757
2810408A11Rik	0.287677	0.774675	2.85381	4.80247
3110009F21Rik	0.655113	1.30172	1.39391	3.41746
4921507P07Rik	0.268896	1.1706	0.497876	1.12885
4930455H04Rik	0.19979	0.9446	1.39611	2.67005
4930533N22Rik	0.0871679	0.656031	2.36755	3.67208
4933407K13Rik	0.331399	0.606553	4.76153	7.10393
5530601H04Rik	0.135483	0.751468	0.79573	1.32146
6330549D23Rik	0.206936	0.774675	1.23272	2.07832
9430038I01Rik	0.342251	1.07236	1.66416	3.48296
9630028B13Rik	0.0460484	1.86214	0.0758167	0.317357
Acnat2	0.229622	1.79704	0.272396	1.01804
Acot3	0.0228702	0.72004	0.896292	1.45901
Adamts1	0.567923	0.736595	8.48785	13.8491
Adamts9	0.195078	0.640047	0.994679	1.52217
Adck3	0.12974	0.74046	0.744411	1.22651
Add2	0.492421	0.718696	2.36236	3.80859
Add3	0.392872	0.646438	3.84668	5.8993
Adgrl3	0.420066	0.691114	2.77692	4.39379
Agk	0.180501	0.633203	2.61133	3.97754
Agt	0.273917	1.00039	1.05315	2.09395
Akr1e1	0.0871679	0.656031	2.11047	3.27336
Alcam	0.663226	0.776327	18.46	30.9519
Aldh3a1	0.67329	1.05201	4.26149	8.68427
Aldoc	0.209846	0.715041	1.57458	2.54223
Ano6	0.530269	0.608665	35.088	52.3685
Aqp9	0.447182	2.55604	0.0207382	0.217017
Arl14	0.0745783	0.702325	2.42092	3.88455
Armcx3	0.38685	0.601362	7.85756	11.6754
Arsg	0.559227	1.54726	0.266218	0.795963
Atp2b4	0.213745	0.6053	0.949839	1.41763
BC051226	0.099619	2.00349	0.230564	1.12596
BC052040	0.188214	0.589	2.72681	4.02418
Bbs10	0.315066	1.02734	0.72695	1.47237
C1s1	0.611523	1.07724	1.60043	3.32695
C1s2	0.576532	1.40473	0.485033	1.2943
C2cd4c	0.315083	0.809322	0.678651	1.1703
C3	1.65823	1.83114	5.96711	20.8101
C4a	0.745996	2.28925	0.0722528	0.390651
C4b	1.11282	2.00349	0.17956	0.739085
Cacna1h	0.86811	1.30606	0.619844	1.51076
Cadm4	0.103228	0.598001	2.27675	3.38571
Cbarp	0.299175	0.619823	3.56695	5.37342
Cbs	0.737414	1.01936	5.41636	10.7692
Ccdc17	0.123501	1.0226	0.612381	1.24794
Ccdc175	0.0465451	1.319	0.270014	0.693555
Ccdc64	0.199195	0.792597	1.70714	2.91667
Cda	0.167159	0.833569	3.03239	5.34447
Cdh15	0.0123166	1.68157	0.136246	0.475254
Cdh17	0.749701	0.844596	36.9222	64.9035
Cdk14	0.3904	0.76613	1.50607	2.51417
Cdkn2b	0.638887	0.782009	40.8759	68.8183
Cebpa	0.219011	0.647845	2.4463	3.76314
Celsr1	0.623305	0.777516	4.44018	7.45271
Cfb	0.615188	0.80269	11.9621	20.4369
Cfh	0.657803	1.83357	0.162689	0.603606
Chst4	0.458667	1.76645	0.322789	1.14848
Chsy3	0.630179	1.35534	0.449012	1.14858
Cideb	0.338637	0.710421	7.20979	11.5763
Cldn2	0.673052	0.720859	170.554	275.121
Clec2d	0.293274	0.663644	7.12583	11.0741
Col15a1	0.342185	0.745131	1.33509	2.1973
Col6a2	0.359015	0.617281	4.88209	7.33729
Cp	0.586778	0.658584	37.5909	58.0789
Ctnnb1	0.567761	0.595817	434.763	643.073
Ctsc	0.461237	0.602944	5.53303	8.22709
Cxcl1	0.519309	0.734033	26.8708	43.7806
Cxcl5	0.998422	1.12615	39.53	84.4875
Cxxc4	0.234852	0.681566	1.0457	1.64745
Cybb	0.74659	1.38611	0.47569	1.23737
Cyp21a1	0.217313	2.0966	0.100714	0.526969
Cyp51	0.55546	0.679195	18.0489	28.2925
Dact2	0.03816	0.651819	1.10316	1.70757
Dbndd1	0.166502	1.06008	0.46515	0.973523
Dbp	0.199675	0.734033	2.38533	3.90528
Ddit4	0.844434	0.941718	70.3432	132.268
Ddx60	0.395592	1.12045	0.312342	0.67625
Dio3	1.10679	1.29446	15.4828	37.2144
Dio3os	1.02064	1.26238	13.6283	32.062
Diras2	0.133637	0.689694	0.861168	1.36731
Dmbt1	0.741598	2.13223	0.0930676	0.432852
Dnajc28	0.239194	0.845795	0.840074	1.49066
Dpcr1	0.35282	1.29454	0.396061	0.984349
Dpy19l1	0.474362	0.633188	10.1761	15.4531
Dram1	0.0398732	0.627118	1.21894	1.8532
Dscam	1.13539	1.97107	0.146703	0.586984
Dsg3	0.925319	2.68157	0.0471455	0.378242
E130201H02Rik	0.448629	0.741827	15.9309	26.118
E230013L22Rik	0.179134	0.711313	2.19135	3.53075
E330009J07Rik	0.554533	0.967093	3.24278	6.23287
Efcab7	0.00846101	0.614003	1.77454	2.67407
Egr1	0.353074	0.601306	6.45159	9.58822
Ehf	0.990674	1.2774	2.79599	6.65256
Elovl6	0.500077	0.681566	6.10961	9.5959
Enpep	0.594055	1.35964	0.368201	0.947216
Epb41l4aos	0.177883	0.695641	9.98933	15.9142
Ephb2	0.0867351	0.701466	0.277681	0.445148
Eps8l3	0.0273263	0.869193	0.654111	1.19044
Exoc3l4	0.24438	0.888799	0.732572	1.34157
Eya2	0.668162	1.08874	2.13008	4.4581
Fahd2a	0.221475	0.713275	3.89664	6.28185
Fam46a	0.188404	0.923767	0.351814	0.662688
Fam84a	0.922176	1.21946	3.41889	7.81507
Fga	0.11424	1.83357	0.0960683	0.382021
Fgb	1.21052	3.18407	0.0410413	0.68717
Fmnl2	0.391386	0.636307	3.4425	5.24202
Fmo2	0.551445	2.01414	0.154815	0.668284
Garem	0.572724	0.849857	3.0774	5.43793
Gas1	0.734809	1.03352	3.83512	7.70297
Gbp10	0.351968	1.01643	0.658754	1.32128
Gbp2	0.525374	1.02843	1.68298	3.38475
Gbp2b	0.221808	0.868335	0.915715	1.653
Gbp6	0.375152	0.885099	0.972257	1.76876
Gbp7	0.357077	0.931973	0.574154	1.0815
Gc	0.917342	0.9988	92.0983	180.153
Gcnt3	0.283155	0.814833	0.915608	1.58644
Gda	0.234899	0.611177	1.57313	2.35709
Gldc	0.341079	0.585247	5.44094	7.99623
Gls2	0.587209	1.22372	0.959679	2.22568
Gm19710	0.135994	1.141	1.51308	3.37787
Grip1	0.359808	0.722789	1.38237	2.23854
Gsap	0.573531	0.954159	1.99966	3.8063
Gstt1	0.149583	0.911048	1.74313	3.25735
H1f0	0.54068	0.610768	109.514	163.684
H2-Q5	0.363566	0.706019	8.47288	13.5572
Habp2	0.381341	0.656031	7.68695	11.87
Hal	0.604852	2.68157	0.0234075	0.269446
Hmgcs1	0.782055	0.871495	39.9584	71.5614
Hnf4a	0.645618	0.70898	64.0451	102.467
Hp	0.0245631	1.52956	0.431986	1.30594
Hpx	0.326005	0.810299	3.22789	5.56892
Hrnr	0.35898	1.90396	0.0424006	0.171144
Ifi202b	0.525536	0.96072	3.16319	6.05609
Ifi203	0.893503	1.40819	0.725963	1.90614
Ifi44	0.070501	0.865278	0.577203	1.04542
Ifit1	0.106033	0.603563	1.83542	2.7402
Ifit1bl2	0.0214525	1.75957	0.0959255	0.361377
Igfbp5	0.247165	2.0226	0.044112	0.207727
Iigp1	1.08052	2.52287	0.144702	0.908553
Insig1	0.476784	0.612433	25.16	37.6566
Isg15	0.316475	0.795601	6.48995	11.0808
Itga9	0.0273263	0.869193	0.209397	0.381088
Itpk1	0.339796	0.609511	5.85451	8.75218
Jchain	0.0245631	1.52956	0.276413	0.835629
Kif12	0.594519	1.48127	0.487771	1.38117
Klhl34	0.339733	0.916031	1.22921	2.28965
Krt23	0.341373	0.805141	3.39778	5.83829
LOC100503496	0.248531	0.914765	1.34496	2.51058
Lbp	0.693326	0.913739	9.10202	16.8024
Lcn2	1.79417	2.2457	4.61668	21.7007
Lefty1	0.034069	0.642572	1.97216	3.0325
Lgals4	0.488523	0.798842	8.2548	14.0842
Lgals6	0.337805	0.687964	10.6761	16.8706
Lifr	0.900161	1.33151	0.506067	1.2553
Lonrf1	0.447808	0.887657	1.44557	2.6301
Ltbp1	0.510036	0.611177	14.7649	22.0763
Mamdc2	0.0282391	0.660504	0.870313	1.35601
Maml3	0.316718	0.597342	2.37928	3.52726
Mctp1	0.366184	0.935323	0.76765	1.44912
Med13l	0.470871	0.619003	5.99392	9.0125
Mep1a	0.0471798	0.977959	0.397551	0.78582
Mipol1	0.225051	0.630036	5.01722	7.61995
Mir1668	0.0647306	0.774675	20.5137	34.7258
Mir1905	0.249797	0.833569	39.3646	69.2051
Mir5114	0.816237	1.06008	295.273	603.587
Mir6909	0.190572	0.718092	66.6404	107.874
Mir6942	0.133862	1.49515	10.5833	31.01
Mir6977	0.0324463	1.0966	14.122	30.6119
Mir7084	0.29372	0.879012	45.1905	82.034
Mon1a	0.229005	0.596677	4.28332	6.35265
Mrc1	0.394161	0.815975	1.18967	2.05797
Msh5	0.252173	0.786263	1.34312	2.2811
Msmo1	0.580222	0.732088	28.1025	45.7049
Mthfd2l	0.297565	0.657831	4.08339	6.3194
Mvd	0.502761	0.765665	9.00486	15.0047
Mycn	0.167159	0.833569	0.944992	1.66551
Myo7a	0.499389	0.727284	2.9792	4.83187
Naga	0.457738	0.681566	12.4526	19.5645
Naprt	0.016629	0.845065	0.819783	1.46553
Ncald	0.591251	0.824691	5.17929	8.98875
Neat1	0.584843	0.657824	10.9777	16.952
Nedd9	0.384701	0.679306	2.88011	4.52089
Nek3	0.214235	0.681566	2.61381	4.11935
Ngef	0.0362957	0.619025	1.03018	1.55717
Nlgn2	0.4594	0.639502	7.47281	11.3991
Nr2f1	0.157959	0.867122	0.875991	1.58338
Nrarp	0.820551	1.06943	6.69396	13.7738
Nrep	0.600831	1.18971	1.15235	2.60363
Nsdhl	0.473102	0.672308	13.6218	21.2602
Oasl2	0.162553	0.743722	1.07048	1.76649
Osgepl1	0.111849	0.600178	2.58629	3.8515
Osmr	0.341433	0.774675	1.25511	2.10986
Paox	0.366941	0.729546	5.09179	8.28424
Parp14	0.445319	0.661033	3.56132	5.51565
Parp9	0.45574	0.698368	5.65153	8.98491
Pax9	0.161162	0.629727	1.25124	1.90171
Pcsk4	0.103458	0.761419	1.02717	1.71984
Pcsk9	0.584053	0.71719	19.099	30.7394
Pdp2	0.514979	0.85012	2.86063	5.06005
Pdzk1	0.0455856	0.613662	1.49403	2.24917
Piezo2	0.793084	1.03158	1.76986	3.5467
Pigh	0.221265	0.589372	3.81528	5.62978
Pilra	0.323497	0.593872	6.46078	9.5541
Pilrb2	0.161162	0.629727	3.00103	4.56115
Pipox	0.211882	0.966543	1.01895	1.98026
Plce1	0.532454	0.753621	2.51198	4.14907
Plekhg4	0.0880393	1.68157	0.108449	0.372887
Plxna3	0.320689	0.648013	1.6086	2.47149
Pmvk	0.309936	0.641409	6.39899	9.78691
Porcn	0.751951	1.09151	3.29687	6.9001
Ppl	0.539817	0.614372	35.2461	52.8125
Proc	0.557749	0.891941	5.81399	10.5879
Proser2	0.368694	0.71618	2.67136	4.30504
Prtg	0.118942	0.719534	0.360947	0.585847
Psmb9	0.00780207	1.39206	0.800966	2.17927
Pzp	1.44515	2.90396	0.0827488	0.692748
Rab3il1	0.217313	2.0966	0.08348	0.436794
Rab40b	0.104956	2.26653	0.0346155	0.28979
Rab7b	0.305285	0.794041	1.04774	1.78731
Rbp1	0.183371	0.669182	1.89226	2.9574
Rbp2	0.117502	0.611177	7.30119	10.958
Rcor2	0.148592	0.736014	1.63478	2.68351
Rfx3	0.331269	0.765153	0.649657	1.08485
Rfx5	0.381107	0.634699	4.48469	6.82186
Rgs9bp	0.0639304	2.0966	0.0196016	0.112818
Robo1	0.334055	0.627627	1.85109	2.80299
Rtn4rl1	0.0900822	0.622065	1.26852	1.91971
Rtp4	0.580826	1.04002	3.16018	6.39927
Rundc3a	0.112212	0.586929	1.75913	2.59495
Saa3	1.96864	3.85149	0.121578	3.3079
Scd1	0.639576	0.774314	13.32	22.305
Scd2	0.963697	1.00269	134.066	262.917
Scd3	0.91926	1.08795	10.8651	22.623
Scd4	0.732332	0.961761	6.80884	12.9969
Serpina7	0.321732	1.77468	0.246404	0.888159
Serpinb1a	0.747413	2.79704	0.033659	0.422674
Setbp1	0.331796	0.587685	1.88064	2.7688
Sirt4	0.158893	0.688946	2.29794	3.64464
Sirt5	0.0981765	0.700675	2.32257	3.72012
Slc12a2	0.800316	0.863292	44.4182	79.0898
Slc16a2	0.179931	0.652301	1.27345	1.96643
Slc16a6	0.253155	0.611177	2.09083	3.1321
Slc17a4	0.0577438	0.797043	0.805999	1.38761
Slc1a2	0.343335	0.621193	1.29993	1.95932
Slc25a47	0.107902	0.989688	0.817189	1.6248
Slc26a2	0.530676	0.640634	26.0705	39.7859
Slc39a10	0.669249	0.80077	13.5336	23.082
Slc40a1	0.603578	0.796583	9.18708	15.6301
Slc43a2	0.621367	0.772184	7.10565	11.8823
Slc4a9	0.173527	0.956426	0.488506	0.943759
Slc7a7	0.377029	0.689179	4.84313	7.65615
Slco5a1	0.307531	0.876478	0.394432	0.714389
Slit2	0.267226	0.591111	1.161	1.71441
Smpd5	0.144986	0.74868	1.69982	2.81644
Sox9	0.757472	0.941454	7.9257	14.9096
Spata1	0.016629	0.845065	0.806974	1.44263
Spns2	0.508876	0.664109	14.6981	22.8036
Spp1	0.81597	0.834922	1950.17	3404.52
Sprr2a1	0.241684	0.780576	0.546021	0.923748
Sprr2a2	0.241684	0.780576	0.546021	0.923748
Sprr2h	0.195661	1.23411	1.20992	2.89403
Sptssb	1.11808	2.55604	0.253452	1.62926
Sult1c2	0.193004	0.70958	2.95248	4.74977
Syt7	0.093322	0.800211	0.315097	0.543097
Tbc1d16	0.4328	0.613155	5.37674	8.05314
Tbc1d4	0.170865	0.589644	1.04016	1.53609
Tceanc	0.0968373	0.635762	1.00498	1.53577
Tcf4	0.382494	0.602339	3.29471	4.89903
Tenm4	1.20725	1.46088	1.07535	2.90466
Tfr2	0.87568	1.73403	0.285803	0.967619
Tgfbr1	0.692998	0.771556	31.6305	52.8525
Tgtp1	0.258294	0.727736	1.86158	3.03034
Tgtp2	0.215696	0.693539	1.81111	2.87887
Tha1	0.139976	0.926679	0.912231	1.72565
Tmem261	0.253852	0.591929	14.7535	21.8018
Tmem44	0.156823	0.611177	1.37001	2.05492
Tnfsf13	0.0328611	0.611177	2.11476	3.1787
Trib2	0.449884	1.35294	0.26143	0.675896
Tsga10	0.016699	1.57053	0.123497	0.387704
Tshz2	0.390286	0.634873	3.95201	6.01186
Ttc25	0.175276	1.81281	0.137455	0.527418
Vash1	0.409988	0.640225	3.68217	5.6216
Vcam1	0.612677	0.723838	28.3082	45.7673
Vnn3	0.374686	1.81907	0.320829	1.19373
Vrk3	0.35003	0.630365	8.76985	13.3033
Vsig1	0.818084	1.16544	3.07863	6.78503
Ybx1	0.810881	0.850935	328.447	579.803
Ypel1	0.325743	0.768718	1.93351	3.23736
Zbtb11os1	0.151244	0.705814	2.7736	4.45378
Zfp146	0.618911	0.795883	18.2225	30.9832
Zfp189	0.236796	0.609054	2.86029	4.27915
Zfp354a	0.00845758	0.774675	0.464676	0.788086
Zfp41	0.32699	0.797043	1.36256	2.32832
Zfp784	0.104277	0.690611	1.56431	2.48697
1190002F15Rik	-0.315133	-0.888599	10.2101	5.34227
1700007K13Rik	-0.343828	-0.814129	11.2414	6.21797
1700091H14Rik	-0.111872	-1.44396	1.44185	0.486725
2210011C24Rik	-0.165773	-1.71075	1.92179	0.521391
2610318N02Rik	-0.253975	-2.36283	0.509936	0.0533629
2610528A11Rik	-0.33371	-1.52789	3.07419	0.982978
3300005D01Rik	-0.201421	-1.13786	1.96546	0.843808
3425401B19Rik	-0.0573725	-1.681	0.267682	0.0730745
4930486L24Rik	-0.753547	-1.15616	10.4854	4.57599
4930515G01Rik	-0.610856	-1.6196	2.32223	0.702035
4931440P22Rik	-0.298703	-1.06094	1.97945	0.908518
4933412E12Rik	-0.025386	-0.617092	3.03317	1.92013
9930111J21Rik1	-1.12564	-1.39653	9.39206	3.48018
9930111J21Rik2	-1.00704	-1.2961	6.29997	2.50213
A230070E04Rik	-0.803849	-2.81029	0.488282	0.0364978
A930006K02Rik	-0.411645	-2.48836	0.912772	0.0868347
Aatk	-0.121631	-0.854487	0.64108	0.341318
Acta2	-0.64632	-0.836725	22.2639	12.1876
Adam19	-0.476841	-0.954023	1.38112	0.692536
Adamts5	-0.740638	-1.27537	1.04357	0.416815
Adcy3	-0.188186	-0.618943	2.11553	1.34258
Adgrf5	-0.493126	-1.16278	0.589984	0.253291
Adora2a	-0.158774	-0.807819	1.78501	0.985861
Adrb2	-0.575769	-1.32563	1.87784	0.714578
Aff2	-0.166173	-0.61389	2.05791	1.31019
Aif1l	-0.492546	-0.611193	45.6474	29.2375
Akr1c14	-0.378094	-0.63708	11.565	7.26691
Aldh1a1	-1.21736	-1.30183	180.203	71.5138
Aldh1a2	-0.588575	-1.23355	2.4808	1.01455
Aldh1a7	-0.943521	-1.25703	12.2221	4.98482
Apbb1ip	-0.277898	-2.22532	0.355831	0.0531948
Aplp1	-0.490425	-0.838787	7.04415	3.84106
Apobec1	-0.0932284	-0.673915	2.4512	1.49133
Arhgap29	-0.727677	-1.14191	2.65081	1.16799
Arhgap31	-0.582368	-0.854487	3.62835	1.95971
Arhgdig	-0.0921182	-0.903396	2.94014	1.50564
As3mt	-0.443818	-1.26597	1.95407	0.771644
Atf3	-0.653013	-1.02369	8.13508	3.89754
Atoh8	-1.01669	-1.34452	10.1703	3.9014
B3galt1	-0.0825739	-0.731216	0.865387	0.504546
B4galt4	-0.424635	-0.806099	5.80235	3.23458
B9d1	-0.495558	-0.974781	11.8425	5.85211
BC030867	-0.443349	-0.851469	4.82344	2.60347
Bcat1	-0.327334	-1.1444	0.406375	0.175106
Bdkrb2	-0.373524	-0.620463	18.4067	11.7019
Bdnf	-0.571019	-0.711921	14.827	8.85471
Bex1	-0.474628	-0.968492	10.0639	4.99269
Bmp8a	-0.461408	-1.48836	1.10286	0.365936
Cacnb4	-0.00844049	-1.71075	0.148717	0.0389066
Calcrl	-0.345606	-1.06778	0.872404	0.39941
Camkk1	-0.0664773	-0.629831	1.68363	1.05711
Ccdc126	-0.15741	-0.625863	3.48746	2.20084
Ccdc18	-0.150391	-0.706999	1.31694	0.783358
Ccl20	-0.487271	-0.855302	18.9166	10.1926
Ccnd3	-0.639303	-0.805447	32.9074	18.4139
Cd200	-0.574895	-1.58789	1.21029	0.374199
Cd40	-0.702286	-1.3233	3.54634	1.36327
Cdc25c	-0.285644	-0.651333	7.27647	4.52005
Cdc42ep3	-0.332329	-0.767513	5.2841	3.0224
Cdhr1	-0.119179	-0.743918	1.13996	0.65925
Celf5	-0.292009	-0.704617	1.91518	1.14523
Cemip	-0.363303	-0.94969	0.853028	0.427338
Cenpw	-0.278893	-0.694169	7.34389	4.4234
Ces2b	-0.435352	-1.31843	1.60117	0.606056
Ces2e	-0.628441	-0.900158	10.6201	5.55678
Ces2f	-0.151019	-0.903396	1.94771	1.00058
Chrm1	-0.056798	-0.765893	0.605936	0.343913
Cldn4	-0.237668	-0.612617	7.30777	4.66299
Clec2l	-0.154034	-2.12579	0.587301	0.094552
Clip3	-0.283178	-1.28191	0.743394	0.286607
Cltb	-0.529831	-0.679327	55.3002	33.7787
Cnn1	-0.753558	-1.53143	2.17684	0.713994
Cnn2	-0.566902	-0.640713	198.601	124.651
Cobl	-0.250652	-0.679725	1.80329	1.09686
Col1a2	-0.524425	-0.801517	5.134	2.87674
Col27a1	-1.08135	-1.24961	11.6448	4.7876
Col3a1	-1.54234	-2.13167	1.89125	0.412824
Col4a1	-0.638313	-0.676609	202.428	123.942
Col4a2	-0.676871	-0.727807	119.857	70.8253
Col4a3	-0.33371	-1.52789	0.26996	0.0863203
Col5a2	-1.40865	-1.72583	4.68447	1.37872
Cpeb2	-0.457523	-0.704934	4.65775	2.79228
Crnde	-0.151019	-0.903396	2.36712	1.21603
Crocc2	-0.268437	-1.14732	0.382411	0.163709
Cryab	-0.684504	-0.821876	89.6228	49.5935
Csrnp1	-0.593714	-0.907735	7.41634	3.85708
Csrp1	-0.679027	-0.749736	228.433	132.939
Ctgf	-0.665852	-0.7004	692.318	416.96
Ctnnd2	-0.559978	-1.38882	0.597155	0.215875
Cxcl12	-1.21823	-1.53533	3.93063	1.32077
Cyp1a1	-0.0190168	-2.01887	0.277967	0.0484804
Cyp1b1	-0.820854	-0.918035	44.8808	23.2393
Cyp26b1	-1.16593	-1.78172	1.65089	0.459764
Cyp2u1	-0.031532	-0.796481	1.41246	0.782518
Cyr61	-0.88345	-0.943981	297.196	151.171
D030025P21Rik	-0.164657	-0.690667	1.73069	1.04224
D630045M09Rik	-0.601894	-1.00196	10.4301	5.06939
Dcc	-0.161532	-0.879938	0.375155	0.196293
Dclk3	-0.870597	-1.85093	0.97815	0.251071
Dcn	-0.79503	-2.30549	1.1046	0.192654
Def6	-0.174315	-0.603836	4.39459	2.8186
Dkk2	-0.239937	-1.24443	0.644708	0.255278
Dlc1	-1.19669	-1.42764	6.01779	2.18416
Dlk2	-0.448695	-0.997373	4.53472	2.20015
Dusp1	-0.665558	-0.788024	70.2424	39.7969
Dusp8	-0.712305	-1.07743	3.52329	1.6262
Dzip3	-0.375738	-0.709421	3.02038	1.80278
Edn1	-0.107683	-0.65011	2.69909	1.67164
Efcab11	-0.324909	-1.00875	2.18417	1.04487
Elmod1	-0.117667	-0.635916	2.65171	1.65976
Elmod3	-0.0257766	-0.587895	2.57076	1.66249
Emx2	-0.0539576	-1.8294	0.447283	0.104014
Endod1	-0.447818	-0.597228	18.8619	12.1966
Eng	-0.324604	-0.843024	2.0965	1.13478
Entpd1	-8.73e-05	-0.768467	0.737131	0.416545
Epn3	-0.384386	-0.604738	9.95628	6.40091
Ero1lb	-0.206803	-0.745855	1.56864	0.908415
Erv3	-0.117399	-0.676626	1.77735	1.07996
Esam	-0.169342	-1.842	0.766059	0.182194
Ets1	-0.630979	-0.72377	45.7902	27.1298
Eya4	-0.221798	-0.743616	1.73246	1.00537
Fam126b	-0.462463	-0.741203	2.85315	1.66715
Fam132b	-0.755463	-1.21706	3.9675	1.65594
Fam174b	-0.0530999	-1.08397	0.795523	0.353175
Fam198b	-0.710303	-1.22025	1.37357	0.570879
Fam212a	-0.253975	-2.36283	0.608463	0.0636733
Fam81a	-0.312929	-0.653676	5.66533	3.51495
Fancb	-0.250393	-0.650912	3.97481	2.46827
Fbn1	-0.425897	-0.798314	1.4607	0.818878
Fbxw10	-0.0573725	-1.681	0.452417	0.123505
Fcrl6	-0.0860802	-1.31843	1.04561	0.388261
Fhl1	-1.01524	-1.4673	4.42446	1.55095
Fkbp10	-0.478702	-0.903396	4.43944	2.30988
Foxf1	-0.221773	-0.652588	4.17962	2.59086
Frmd4b	-0.488596	-0.70846	8.06171	4.82265
Frzb	-0.571962	-1.83628	0.906464	0.231361
Fst	-0.92446	-1.18425	12.4783	5.3602
Fstl3	-0.246568	-0.645599	6.0492	3.77048
Fxyd5	-0.602196	-0.95176	12.4537	6.27661
Gadd45g	-0.541679	-0.744141	45.0112	26.2723
Galnt18	-0.154034	-2.12579	0.325923	0.0524718
Gareml	-0.0166151	-1.48836	0.488564	0.158668
Gata2	-0.705337	-1.43178	1.47311	0.520794
Gcnt1	-0.599017	-1.1115	1.81795	0.815323
Gdnf	-0.187517	-0.903396	0.809129	0.416421
Gfpt2	-0.00900927	-0.942925	0.778327	0.38462
Glyat	-0.00900927	-0.942925	1.77411	0.876699
Gm10697	-0.253975	-3.36283	0.315532	0
Gm12185	-0.209683	-0.710751	1.44086	0.856127
Gm12866	-1.77543	-4.65828	1.00449	0
Gm13040	-0.406309	-1.27018	0.490935	0.192654
Gm13057	-0.406309	-1.27018	0.490935	0.192654
Gm13119	-0.554206	-2.60384	0.373887	0.0326049
Gm14137	-0.0824092	-0.589288	2.31541	1.49785
Gm15328	-0.231548	-1.05867	1.04091	0.476555
Gm17757	-0.440208	-1.15394	0.504823	0.217526
Gm18853	-0.440208	-1.15394	0.50378	0.217077
Gm20554	-0.164956	-0.585035	2.0384	1.32491
Gm20765	-1.12301	-1.51426	2.07248	0.704852
Gm21293	-1.12301	-1.51426	2.12187	0.721648
Gm21304	-1.12301	-1.51426	2.12187	0.721648
Gm21312	-1.12301	-1.51426	2.07248	0.704852
Gm29683	-0.0367774	-0.903396	1.0579	0.540027
Gm3086	-0.49853	-2.4059	1.64479	0.215151
Gm4070	-0.459367	-0.602697	5.08333	3.27469
Gm4302	-0.448287	-1.72937	1.33399	0.367359
Gm4303	-0.948018	-1.71075	1.34791	0.389754
Gm4305	-0.948018	-1.71075	1.34791	0.389754
Gm4307	-0.948018	-1.71075	1.34791	0.389754
Gm4312	-0.552789	-2.09604	1.0948	0.221742
Gm4340	-1.05019	-1.51005	2.0685	0.703497
Gm5431	-0.576959	-1.14802	2.34677	1.02325
Gm6763	-1.12301	-1.51426	2.12187	0.721648
Gm8764	-1.12301	-1.51426	2.12187	0.721648
Gm8979	-0.325421	-0.808932	2.49317	1.38356
Gm8989	-0.582531	-1.04449	2.4213	1.14021
Gng13	-0.145252	-1.9034	2.9628	0.652728
Gprc5a	-0.538493	-0.650479	74.3148	46.3213
Gpx3	-0.602072	-1.09895	6.00044	2.71655
Grb10	-0.280054	-0.730248	1.85238	1.0871
Grem1	-0.288288	-0.71513	6.45973	3.83334
Gria3	-0.0313256	-0.699863	0.788623	0.469766
Grk5	-0.136584	-0.601127	2.69076	1.72787
Gvin1	-0.459367	-0.602697	5.08164	3.27361
Hic1	-0.455419	-1.20296	0.90542	0.375987
Hist1h3a	-0.282058	-1.71075	4.37245	1.21119
Hist1h3b	-0.0566219	-0.903396	6.02167	3.07745
Hist1h3c	-0.444443	-1.42277	5.64882	1.97042
Hist1h3d	-0.201421	-1.13786	4.99555	2.14468
Hist1h3f	-0.107532	-1.1835	2.35926	0.972587
Hist1h3g	-0.0893257	-1.07332	4.59253	2.05968
Hist1h3h	-0.231851	-1.1149	5.6885	2.49187
Hist1h3i	-0.268437	-1.14732	5.88105	2.51767
Hist1h4a	-0.0789392	-0.742932	9.50633	5.49368
Hist1h4b	-0.0553236	-0.721558	9.46849	5.55472
Hist1h4h	-0.311383	-0.874827	14.6925	7.76522
Hoxa4	-0.732112	-2.48836	0.971748	0.132639
Hoxa5	-0.179519	-1.15132	1.27258	0.539883
Hrh1	-0.325181	-1.31843	0.6174	0.231928
Hs3st3a1	-0.262936	-1.85093	0.426775	0.103062
Hspb2	-0.149044	-0.879149	4.45757	2.33234
Ifit2	-0.462312	-0.693049	9.25292	5.59414
Igfbp2	-0.411645	-2.48836	0.501863	0.0477437
Il6	-0.411645	-2.48836	0.622381	0.0592089
Il7	-0.311383	-0.874827	1.78029	0.940911
Ilk	-0.587509	-0.705812	75.1057	45.0502
Inhba	-0.562216	-0.684247	85.9224	52.3139
Inhbb	-0.620532	-0.93902	4.96132	2.52447
Irx1	-0.139013	-1.36283	1.00187	0.360393
Itgb6	-0.411429	-0.651633	6.48106	4.03229
Jam2	-0.513753	-0.77733	6.00414	3.42205
Jam3	-0.128974	-0.706705	2.8838	1.71465
Jph2	-0.31268	-2.0409	0.318617	0.0635087
Kif18b	-0.424476	-0.605661	17.2038	11.0571
Kif1a	-0.559382	-0.942216	1.74565	0.884961
Kif5a	-0.421055	-1.36283	0.39623	0.144642
Klhdc8b	-0.0484769	-0.587369	2.12059	1.37265
Klhl13	-0.693744	-0.824787	32.0821	17.7179
Krt80	-0.471688	-0.874542	7.16906	3.8082
Layn	-0.51139	-1.1888	2.78329	1.17261
Lce1f	-0.0910484	-1.77787	1.89082	0.471112
Lce1g	-0.78986	-1.54976	4.97138	1.612
Lce1h	-2.09279	-3.94779	2.92614	0.0956904
Lce1i	-0.0190168	-2.01887	1.05977	0.184836
Lhfp	-0.427869	-0.662799	16.6571	10.284
Lhx6	-0.421742	-0.926117	2.2921	1.17097
Lhx9	-0.184104	-0.957844	0.595055	0.293728
Lincenc1	-0.385748	-1.95402	0.510051	0.114375
Lox	-0.869446	-1.23559	3.67669	1.51984
Lpin3	-0.627585	-1.09604	2.91363	1.32315
Lrp2	-1.00554	-1.52559	0.65113	0.218392
Ltbp2	-0.605988	-0.800422	8.18339	4.59386
Mafk	-0.616456	-0.776882	27.9027	15.9268
Mal	-0.380352	-1.07848	1.60349	0.729562
Map2	-0.0711738	-0.625095	0.59907	0.377491
Map4k1	-0.481684	-1.2146	1.57925	0.651035
Mapkapk3	-0.431263	-0.817141	4.81433	2.66295
Masp1	-0.545705	-0.716983	24.4673	14.5572
Mcam	-1.38064	-1.53285	43.3511	14.6468
Meg3	-0.0505679	-0.733471	0.31392	0.182503
Mmp2	-0.1291	-0.967527	0.955312	0.466526
Mmp24	-0.368614	-0.636839	6.1198	3.84562
Morc4	-0.248079	-0.739898	1.81564	1.05726
Mrc2	-0.191198	-0.928059	0.645468	0.326083
Mttp	-0.327278	-0.652478	4.06964	2.52766
Mybl1	-0.711555	-1.03737	4.22269	2.00612
Myh15	-1.00936	-1.3352	3.8083	1.47049
Myl9	-1.28102	-1.80225	10.6106	2.93185
Mylk4	-0.167065	-0.640362	1.47633	0.922163
Mzt1	-0.425754	-0.594514	29.217	18.9257
Nbl1	-0.500696	-0.66866	38.9472	23.9633
Nefm	-0.680686	-2.27263	0.599609	0.104578
Nell2	-0.201421	-1.13786	0.794747	0.341199
Nes	-0.728042	-0.793124	79.4591	44.8728
Nexn	-0.126321	-0.599616	3.19768	2.05518
Nkain4	-0.0849461	-1.59145	1.90276	0.568904
Nnmt	-0.0609251	-0.751393	3.95122	2.26747
Notch3	-0.335889	-0.865594	0.910296	0.484801
Nox1	-0.036198	-0.777866	1.36017	0.764403
Nppb	-0.235006	-2.07332	1.40523	0.259503
Npr3	-0.443942	-0.864084	1.58489	0.847692
Nrcam	-0.316843	-0.938162	0.706807	0.356456
Nrk	-0.404405	-0.782305	2.11216	1.19725
Nsg1	-0.237092	-0.782542	3.07706	1.73629
Ntn1	-0.385191	-0.903396	1.33886	0.694647
Oip5	-0.162242	-0.596735	6.26091	4.03522
Olfr56	-0.320973	-1.04542	2.10733	0.980107
Otud1	-0.556289	-0.898235	7.09652	3.71312
P3h2	-0.222191	-0.777866	2.81436	1.59277
P4ha3	-0.3138	-0.840932	3.06247	1.65961
Palld	-0.504408	-0.594718	34.1044	22.0979
Palm3	-0.763779	-1.07235	9.75354	4.52406
Papss2	-0.642305	-1.29167	1.4966	0.587301
Pcolce2	-0.562996	-0.96882	6.98858	3.47562
Pde2a	-0.294191	-1.1929	0.598145	0.247463
Pdgfrb	-0.392304	-1.18719	0.655955	0.274573
Pdgfrl	-0.0241065	-1.9034	0.631682	0.132206
Pdk4	-0.0737026	-0.595274	1.9444	1.25215
Pdzk1ip1	-0.206578	-0.685805	7.31923	4.42803
Pfpl	-1.20364	-3.15132	0.296591	0.0172428
Pgf	-0.945891	-1.29076	12.5124	4.98045
Phf19	-0.322943	-0.957844	1.37981	0.685862
Plau	-0.44086	-0.604331	30.116	19.3763
Plxna4	-0.100621	-0.661196	0.471824	0.289808
Pmaip1	-0.5895	-0.712167	49.5738	29.6041
Pmp22	-1.35755	-1.70527	10.7871	3.21702
Polq	-0.534377	-0.886908	1.9627	1.03485
Prkab2	-0.200954	-0.622768	2.45444	1.55377
Prl2c3	-0.19099	-0.603836	12.7297	8.16715
Prl2c5	-0.596588	-1.48836	3.31747	1.11091
Procr	-0.745299	-0.913178	50.7792	26.3671
Prph	-0.235006	-2.07332	0.588463	0.108671
Prss23	-0.673878	-0.901141	12.7675	6.68035
Psca	-0.808399	-2.16643	3.54465	0.7103
Ptgs2	-0.782278	-0.854967	89.8744	48.6231
Ptprb	-0.813355	-1.01031	4.85051	2.35362
Qpct	-0.380352	-1.07848	2.31523	1.05339
Qpctl	-0.463286	-0.81168	7.9314	4.40732
Rab30	-0.154353	-0.693179	3.38368	2.03338
Rad51	-0.458007	-0.648616	24.6697	15.3884
Rad51ap1	-0.42484	-0.830148	6.71965	3.6816
Rangrf	-0.00567968	-0.654369	4.62099	2.84452
Rcn3	-0.121631	-0.854487	2.53255	1.34836
Reln	-0.439386	-0.87771	0.916106	0.48511
Ret	-1.55896	-1.79929	7.74765	2.17185
Rftn1	-0.505779	-0.918503	4.40063	2.26638
Rgs16	-0.498931	-1.4009	1.29945	0.46292
Rhbdl2	-0.143694	-0.605173	7.10826	4.55194
Ripk3	-0.286447	-0.846813	3.25254	1.7534
Rn4.5s	-0.43207	-0.757355	10.7596	6.21217
Rnf225	-0.0459874	-0.652588	1.55465	0.959444
Rora	-0.416623	-0.719495	1.72909	1.02534
Rpph1	-0.77801	-2.64036	3.77415	0.415738
Rrm2	-0.60004	-0.68535	123.756	75.3048
Rusc2	-0.628015	-0.762418	20.4158	11.7732
S100a7a	-0.375955	-0.613636	44.9553	28.7187
Scarf2	-0.382627	-0.614858	10.5772	6.75165
Scml2	-0.840169	-2.48836	0.383565	0.0553636
Sdcbp2	-0.415604	-1.08272	3.50958	1.5947
Selp	-1.44644	-1.92939	4.18744	1.06111
Sema3a	-0.941036	-1.37657	1.8602	0.695226
Sema4f	-0.535996	-0.767933	9.13227	5.24124
Serpinb9b	-1.00401	-1.11908	93.2391	41.9914
Serpine1	-0.79622	-0.858301	182.309	98.4076
Serpinf1	-0.453911	-0.886718	7.38916	3.88885
Sfrp4	-0.181479	-1.62586	1.17512	0.345857
Sh3tc1	-0.338903	-0.609284	5.63409	3.6088
Siglecg	-1.1128	-1.60189	4.78207	1.52303
Slc16a3	-0.428637	-0.784752	6.11258	3.46045
Slc22a5	-0.203853	-0.597065	3.84644	2.48037
Slc25a48	-1.0835	-2.9034	0.991209	0.0901968
Slco4a1	-0.993181	-1.35921	6.23	2.36276
Slit3	-0.151245	-0.597588	1.84783	1.18996
Smad9	-0.318989	-1.09243	0.671978	0.301371
Smpdl3b	-0.11871	-0.702484	2.88414	1.71964
Sncg	-0.0934433	-0.701763	6.96731	4.15312
Snord22	-0.11659	-1.06386	18.9575	8.57872
Sod3	-0.464827	-0.600223	50.3204	32.4738
Sorbs3	-0.143066	-0.617994	2.37441	1.50649
Sp5	-0.130394	-0.747746	2.40129	1.3853
Spc25	-0.386806	-0.6383	16.2619	10.2105
Spint1	-0.280531	-0.661842	5.73469	3.53533
Sprr1a	-0.702069	-0.729798	3311.66	1954.29
Sprr1b	-0.00405439	-1.09604	2.4406	1.07103
Spry1	-0.331692	-0.600252	10.3842	6.69341
Srgap3	-0.562052	-0.778949	4.83131	2.75217
Stard13	-0.806658	-1.02837	8.12985	3.89432
Stbd1	-0.334866	-0.643478	10.017	6.26225
Strip2	-0.154034	-2.12579	0.156315	0.0251657
Sulf1	-0.164849	-1.48836	0.424723	0.138893
Susd1	-0.531874	-1.80152	0.783707	0.20503
Synpo2l	-0.239552	-1.44772	0.474383	0.160608
Tagln	-1.85162	-2.18241	22.8761	4.89855
Tbkbp1	-0.191917	-0.684387	2.34228	1.418
Tdpoz5	-0.253975	-3.36283	0.315532	0
Tex15	-0.259801	-0.923296	0.552827	0.281221
Tex30	-0.285367	-0.65372	11.0233	6.83585
Tgfb1i1	-0.34455	-0.877861	1.83553	0.969061
Thbs1	-0.743879	-0.805463	93.503	52.3547
Thbs2	-0.0962648	-1.01887	0.414252	0.193934
Tigit	-0.309995	-0.649822	17.0277	10.5931
Timp3	-1.07281	-1.13279	143.335	63.9638
Tiparp	-0.55286	-0.820934	6.85364	3.78933
Tll1	-0.0311978	-1.27263	0.393007	0.150798
Tlx3	-0.52919	-1.32661	2.4441	0.926048
Tm6sf2	-0.262936	-1.85093	1.16079	0.280321
Tmem119	-0.803849	-2.81029	0.434942	0.0325108
Tmem130	-0.252155	-0.796481	2.43214	1.35906
Tmem141	-0.158761	-0.823226	4.22227	2.30528
Tmem71	-0.313323	-1.61389	0.770906	0.230493
Tmem8	-0.0584944	-0.658284	1.49137	0.916892
Tnfrsf18	-0.156681	-1.22532	2.17971	0.872141
Tnfsf18	-1.30716	-2.99086	1.03218	0.0981939
Tpm2	-0.596458	-0.865261	8.6763	4.65143
Traip	-0.183798	-0.602737	3.90172	2.50491
Trim52	-0.0190168	-2.01887	0.219522	0.038287
Tspan2	-0.275704	-0.857593	1.36161	0.727922
Ttc39a	-0.201571	-0.846813	1.9547	1.0504
Uchl1	-0.00243061	-0.839266	2.42022	1.29578
Unc13d	-0.227852	-0.634908	2.8479	1.78813
Upk1b	-0.762702	-1.14983	8.79505	3.85715
Upk3b	-0.344868	-1.29571	1.30004	0.497721
Usp17lc	-0.133261	-1.99086	0.608678	0.11943
Uts2b	-1.40047	-1.67116	49.9454	15.2914
Vav3	-0.0407146	-0.716311	0.812688	0.478377
Vcan	-0.107683	-0.65011	0.430708	0.266753
Vgll3	-0.538054	-0.724263	17.1327	10.1407
Vstm5	-0.332466	-0.650278	9.44987	5.87899
Wdr62	-0.393626	-0.646621	6.27344	3.91616
Wdr76	-0.272098	-0.591737	4.27445	2.76979
Wnt5b	-0.0190168	-2.01887	0.291897	0.0509099
Wnt7a	-0.726649	-0.900761	22.2172	11.6354
Wt1	-0.374066	-1.14218	1.21098	0.524378
Xirp2	-1.50467	-1.61574	20.6708	6.59716
Zim1	-0.613747	-0.929708	6.10359	3.12605
